# Supplementary material for: Self-organization of mortal filaments and its role in bacterial division ring formation
Source: PubMed Central journal article supplement (PMC11473364; doi:10.1038/s41567-024-02597-8), 2024-08-12
Supplement: 41567_2024_2597_MOESM1_ESM.pdf [file 41567_2024_2597_MOESM1_ESM.pdf]

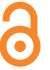

---

# Self-organization of mortal filaments and its role in bacterial division ring formation

---

In the format provided by the authors and unedited

1    **CONTENTS**

|    |                                                                                  |     |
|----|----------------------------------------------------------------------------------|-----|
| 2  | A. Simulation details                                                            | S2  |
| 3  | B. Treadmilling polymerisation kinetics and their molecular origin               | S5  |
| 4  | C. A simplified model for treadmilling kinetics                                  | S6  |
| 5  | D. Single filament analysis                                                      | S10 |
| 6  | E. Collective dynamics analysis                                                  | S13 |
| 7  | F. Death by misalignment through treadmilling kinetics drives ordering in dilute |     |
| 8  | conditions as well                                                               | S17 |
| 9  | G. Treadmilling is essential for ordering                                        | S21 |
| 10 | H. High-speed AFM data                                                           | S23 |
| 11 | I. Implementing the spatio-temporal modulation of kinetics                       | S25 |
| 12 | J. The effect of attractive interactions                                         | S26 |
| 13 | K. Z-ring dynamics analysis                                                      | S27 |
| 14 | L. Arrested treadmilling stops condensation in simulations                       | S29 |
| 15 | M. Reconstitution of FtsZ <i>in vitro</i> : Materials and Methods                | S30 |
| 16 | N. Supplementary Movies                                                          | S35 |
| 17 | References                                                                       | S38 |

18 This Supplementary Information provides additional details on the treadmilling model  
19 presented in this work together with technical information about its implementation in  
20 simulations. It also includes complementary supporting data for the results presented in the  
21 manuscript as well as details on some of the measurements and experimental setup.

22

23 **Ethical regulations statement:** No ethics oversight was required for this study.

## 24 A. Simulation details

25 We consider coarse-grained polymers made of spherical beads with diameter  $\sigma = 5$  nm in  
26 a two-dimensional box of size  $L$ . Filament stretching rigidity is captured by harmonic  
27 springs between pairs of neighbouring beads:  $E_{\text{bond}}(r) = K_{\text{bond}}(r - \sigma)^2$ . Filament bend-  
28 ing rigidity is captured by harmonic angle potentials between monomer triads:  $E_{\text{bend}}(\alpha) =$   
29  $0.5K_{\text{bend}}(\theta - \theta_0)^2$  where  $\theta$  is the angle formed by the three monomers involved and  $\theta_0 = \pi$   
30 is the straight equilibrium configuration. Note that we can then define the persistence  
31 length of the filaments as  $l_p = 2K_{\text{bend}}\sigma/k_B T$ . Typically we set  $K_{\text{bond}} = 1000 k_B T/\sigma$  and  
32  $K_{\text{bend}} = 1000 - 10000 k_B T$  (so filaments are quite stiff —  $l_p > 1 \mu\text{m}$ ). Additionally, to model  
33 the cross-linking interactions mediated by partner proteins such as ZapA, we can introduce  
34 a Lennard-Jones potential between monomers of different filaments. This potential is of the  
35 form  $E_{\text{LJ}}(r) = 4\epsilon[1/r^{12} - 1/r^6 - (1/r_c^{12} - 1/r_c^6)] \forall r < r_c$  and  $E_{\text{LJ}}(r) = 0 \forall r > r_c$ , which is  
36 shifted to guarantee continuity at  $r = r_c$ . Note that, because we expect cross-linking in-  
37 teractions to be strong and short-ranged we choose a cutoff at distance  $r_c = 1.5\sigma$  and a  
38 large interaction strength  $\epsilon = 24 k_B T$ . When no cross-linking effects are present we imple-  
39 ment volume exclusion via hard sphere interactions between beads. Finally, because FtsZ  
40 filaments are curved and live on a curved surface a tension will arise from the mismatch  
41 between the filaments intrinsic curvature and the one they sense and have to adapt to on  
42 the surface. Note that this sensed curvature will depend on their orientation, such that if

43 they align with the cell axis filaments will sense a flat surface but if they align with the  
 44 circumference they will sense a curvature  $c_{\text{surf}} = 1/R_{\text{cell}}$ . FtsZ filaments (and especially  
 45 FtsZ/FtsA composite filaments) are typically more curved than the cell (or at least similarly  
 46 curved) [1–5] such that this curvature tension should result in an effective force that aligns  
 47 filaments along the circumference of the cell. When simulating cell-like systems, therefore,  
 48 we introduce an additional force  $f_{\text{curv}}$  on the head and tail monomers of each filament to  
 49 align it with the circumference direction. The  $X$  and  $Y$  components of this force take the  
 50 form  $f_X = f_{\text{curv}} (1.0 - \cos(\alpha)) \sin^2(\alpha)\cos(\alpha)$  and  $f_Y = -f_{\text{curv}} (1.0 - \cos(\alpha)) \sin(\alpha)\cos^2(\alpha)$ ,  
 51 where  $\alpha$  is the angle of the tail-to-head vector with the circumference axis ( $X$  axis of the  
 52 simulation box). Periodic boundary conditions (PBCs) are implemented in all directions.

53 We evolve our model in Molecular Dynamics (MD) to capture the correct diffusive dy-  
 54 namics of proteins at this scale. We integrate the Langevin equation of motion in time over  
 55 time steps of size  $dt_{\text{MD}} = 0.001\tau$  ( $\tau$  being the simulation time unit) at constant temperature  
 56  $T = 1$  (in reduced units). On top of this we implement growth, nucleation and shrinkage re-  
 57 actions according to our treadmilling kinetics model over reaction steps of size  $dt_{\text{react}} = 0.1$  s.  
 58 The following reactions are implemented in the system: 1) Nucleation: New filaments are  
 59 nucleated in the system at a rate  $r_{\text{nuc}} \text{ s}^{-1}$ . A new filament dimer is created at a random  
 60 position and orientation with probability  $p_{\text{nuc}} = r_{\text{nuc}}dt_{\text{react}}$  as long as no overlaps forbid it.  
 61 2) Growth: New monomers are added to the head of existing filaments at a rate  $r_{\text{on}} \text{ s}^{-1}$ .  
 62 A new monomer is added to the system, at the equilibrium position given by the current  
 63 position and orientation of the existing filament, with probability  $p_{\text{on}} = r_{\text{on}}dt_{\text{react}}$  as long  
 64 as no overlaps forbid it. 3) Shrinkage: Tail monomers are removed from the system with  
 65 probability  $p_{\text{off}}(t_{\text{tail}}, \tau_{\text{det}}) = 1 - e^{-t_{\text{tail}}/\tau_{\text{det}}}$ , where  $t_{\text{tail}}$  is the time since it was added to the  
 66 filament, irrespective of the surrounding conditions. We consider that, unlike for growth, this  
 67 shrinking probability should be independent of the local conditions (i.e. crowding) because  
 68 monomers detach into solution upon depolymerisation and therefore need no space on the



MONOMER DIFFUSIVITY CAN BE CONTROLLED IN SIMULATIONS

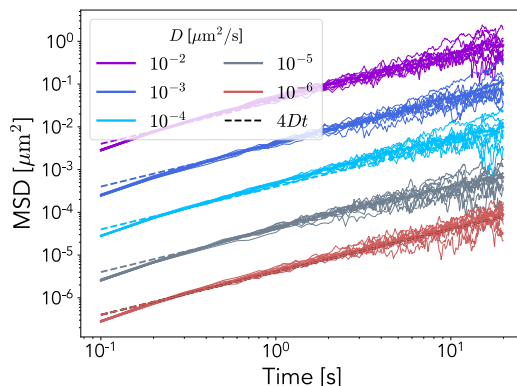

FIG. S1. **Controlling monomer diffusivity in simulations** Mean square displacement (MSD) of individual monomers over time for different simulation parameters that each result in a different and precisely controlled diffusion coefficient  $D$ , as illustrated by the dashed lines.  $N = 10$  replicas for each value of  $D$ .

69 plane to diffuse away [2]. Finally, if at depolymerisation the filament consists only of two  
70 monomers then the whole dimer is removed from the system. Note that, because we are  
71 mixing molecular dynamics and polymerisation kinetics two different timescales emerge in  
72 our system. On one hand, the characteristic time of the kinetics is set by our reaction time  
73 step  $dt_{\text{react}} = 0.1$  s, which allows us to span physiologically relevant growth rates  $r_{\text{on}}$  while  
74 optimising reaction frequency. On the other hand, the diffusive dynamics of the particles  
75 allow us to define a mapping between simulation time  $\tau$  and real time  $t$  that sets the value  
76 of the diffusion coefficient of monomers  $D$  (in  $\text{nm}^2/\text{s}$ ) to physiologically relevant values (see  
77 Figure S1). All the simulations are run using a custom version of the LAMMPS (Large-scale  
78 Atomic Molecular Massively Parallel Simulator) Molecular Dynamics package [6] available  
79 on GitHub [7]. Reactions, in particular, which involve the creation and deletion of particles  
80 in the system are implemented through a modified version of the bond/react fix in LAMMPS  
81 [8, 9]. Appropriate documentation and example files to replicate the results presented in this  
82 work can be found on the following public repository [10]. Additionally, a maintained version  
83 of the code is available on GitHub [7].

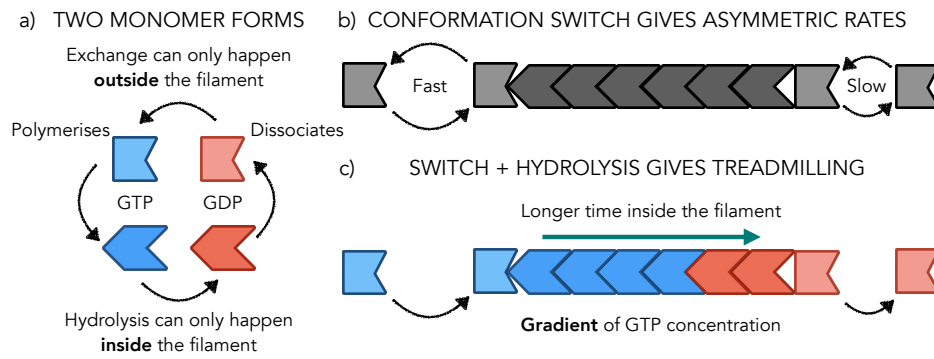

FIG. S2. **Treadmilling kinetics** a) Nucleotide state and monomer conformation schematics b) Polymerisation rates asymmetry arising from the conformation switch of monomers upon polymerisation. c) Treadmilling with asymmetric polymerisation and hydrolysis of nucleotides resulting in growth and shrinkage on opposite sides with the emergence of a GTP to GDP concentration gradient from head to tail.

## 84 B. Treadmilling polymerisation kinetics and their molecular origin

85 Treadmilling is a type of polymerisation kinetics whereby filaments grow and shrink on op-  
 86 posite ends at a constant rate, by addition and removal of monomers. This is an active  
 87 process involving energy dissipation via GTP hydrolysis and a structural transition of the  
 88 monomer upon polymerisation from a relaxed or solution conformation to a tense or fila-  
 89 mentous form (also known as the cytomotive switch) [11, 12]. During nucleotide hydrolysis  
 90 FtsZ monomers change their interface properties and hence their dissociation constant  $K_d$ ,  
 91 such that GTP-bound molecules tend to form filaments while GDP-bound molecules tend to  
 92 dissociate back to the cytosol (see Figure S2a) [13]. Additionally, FtsZ monomers in solution  
 93 or relaxed form are asymmetric, such that interface formation is easier on one end of the  
 94 filament than the other, which results in faster exchange kinetics at the head of the filament  
 95 than at the tail, as depicted in Figure S2b and already proposed by Wegner in 1976 [14].  
 96 The combination of asymmetric exchange rates with nucleotide hydrolysis then enables the  
 97 net growth of filaments from the head by association of GTP-bound monomers and their  
 98 shrinking from the tail by dissociation of GDP-bound monomers that accumulate towards

99 the tail as nucleotide hydrolysis takes place at the monomer-monomer interface (see Figure  
100 S2c) [11, 12, 15, 16]. Note that because tense GTP-bound monomers in the core of the  
101 filament are stabilised on both sides by their neighbours while the tail monomer is only sta-  
102 bilised on one interface, fragmentation is expected to be quite rare and dissociation mainly  
103 occurs at the tail. In summary, the combination of asymmetric polymerisation kinetics and  
104 GTP hydrolysis in FtsZ result in treadmilling filaments that grow and shrink on opposite  
105 ends at rates that are controlled by the complex balance between association, dissociation  
106 and nucleotide hydrolysis and exchange reactions. A very comprehensive model of this dy-  
107 namics has been proposed by Corbin and Erickson [16]. While such a detailed model is too  
108 complex to consider in our case, where we also need to explicitly model multiple filaments  
109 that interact with one-another, we can draw inspiration to design a simplified version of  
110 treadmilling kinetics. In the end, the main elements of treadmilling are 1) a net filament  
111 growth rate, which depends on the monomer concentration in solution, the amount of GTP  
112 and the relaxed to tense transition; 2) a typical timescale after which monomers in the fila-  
113 ment tend to dissociate from the tail, which depends on the nucleotide hydrolysis rate and  
114 the dissociation reaction of GDP-bound monomers; and 3) a filament nucleation rate, which  
115 again depends on monomer concentration, GTP and relaxed to tense transitions, but need  
116 not be the same as the growth rate. These are therefore the only three parameters we will  
117 keep in our simplified model for treadmilling. Note for instance that the fragmentation rate  
118 estimated by Corbin and Erickson is several orders of magnitude lower than any other rate  
119 in the system, which is why we also choose to neglect this effect in our approach.

### 120 **C. A simplified model for treadmilling kinetics**

121 Let us further discuss our simplified model of treadmilling kinetics. In our approach we  
122 control the growth-shrinking kinetics of filaments via only two free parameters: the imposed  
123 growth rate  $r_{\text{on}}$  and the detachment timer  $\tau_{\text{det}}$ . The first ( $r_{\text{on}}$ ) corresponds to effective rate

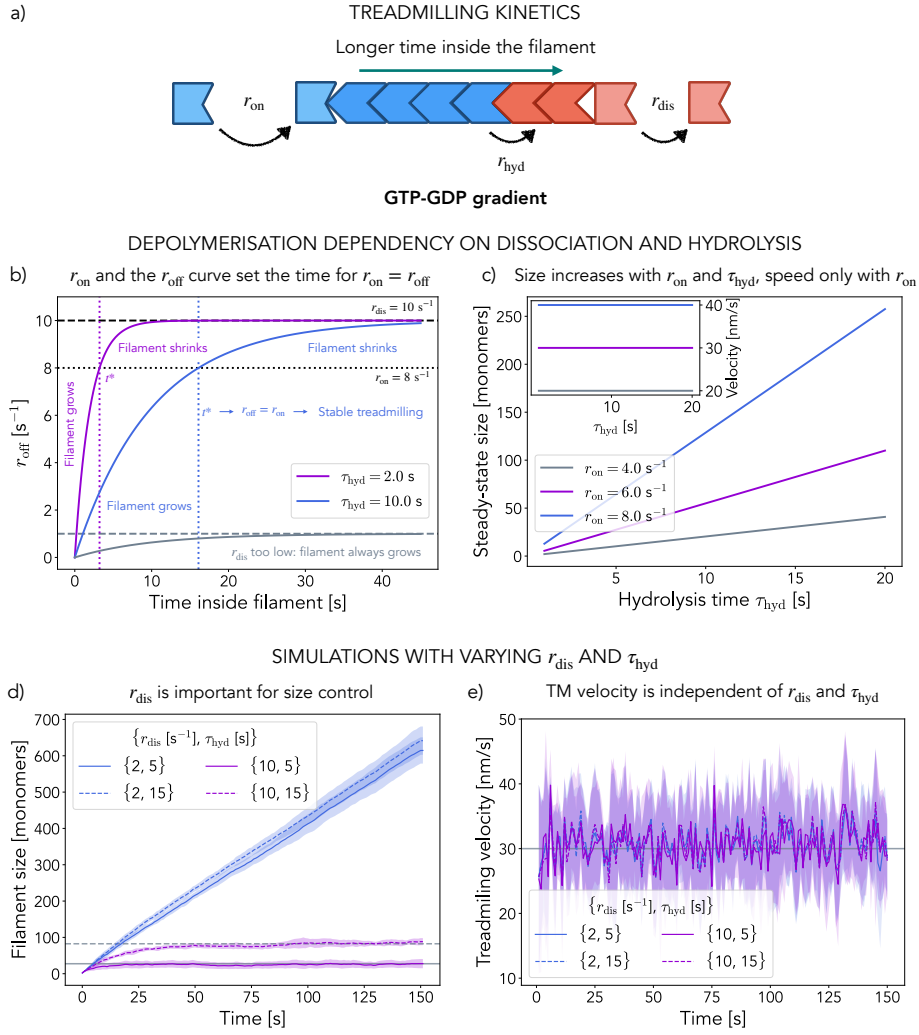

FIG. S3. **Treadmilling kinetics** a) Schematic of how the hydrolysis and dissociation reactions are involved in filament tail depolymerisation. b)  $r_{\text{off}}$  is not constant and varies with the time a monomer has spent in the filament. This variation is controlled by  $r_{\text{dis}}$  and  $\tau_{\text{hyd}}$ :  $r_{\text{off}}$  relaxes to  $r_{\text{dis}}$  over  $\tau_{\text{hyd}}$ . If  $r_{\text{on}} = 8 \text{ s}^{-1}$  (dotted black line) then only at  $t^*$  (vertical dotted lines) are the two rates equal. The value of  $t^*$  depends on  $\tau_{\text{hyd}}$ . c) Steady-state filament size and treadmilling velocity for different  $\tau_{\text{hyd}}$  and  $r_{\text{on}}$ . Only the filament size depends on both while the velocity depends only on the growth rate. d-e) Filament size (d) and treadmilling velocity (e) over time for single treadmilling filaments in our Molecular Dynamics model, varying  $r_{\text{dis}}$  and  $\tau_{\text{hyd}}$  for a fixed  $r_{\text{on}} = 6 \text{ s}^{-1}$ . Only filaments with large  $r_{\text{dis}}$  show stable treadmilling at a constant size. This size depends on  $\tau_{\text{hyd}}$ . Treadmilling velocity is stable for all parameters and only depends on  $r_{\text{on}}$ . Gray lines in panel d) correspond to the expected steady-state size for  $\tau_{\text{hyd}} = 5 \text{ s}$  (solid) and  $\tau_{\text{hyd}} = 15 \text{ s}$  (dashed), assuming  $r_{\text{dis}} > r_{\text{on}}$ . Lines are the average over  $N = 10$  replicas for each parameter set and the shaded regions correspond to the standard deviation.

124 at which filaments grow, which englobes both the reaction rate constant and concentration  
125 effects. Note that we generally assume well-mixed conditions and do not consider the solu-  
126 tion concentration of FtsZ independently. The second parameter ( $\tau_{\text{det}}$ ), on the other hand,  
127 controls the time after which monomers in the filament become available for dissociation  
128 (removal).

129 In reality, the depolymerisation of tail monomers involves two reactions: hydrolysis of the  
130 associated nucleotide (GTP to GDP) and dissociation of the monomer after hydrolysis, each  
131 controlled by rates  $r_{\text{hyd}} = 1/\tau_{\text{hyd}}$  and  $r_{\text{dis}}$  respectively (Figure S3a). The overall shrinking  
132 rate  $r_{\text{off}}$  will therefore result from a combination of the two. Let us now explore in detail how  
133  $r_{\text{off}}$  should depend on  $\tau_{\text{hyd}}$  and  $r_{\text{dis}}$  and justify how we simplify our model to control it via a  
134 single free parameter  $\tau_{\text{det}}$ . The probability for a tail monomer to detach from the shrinking  
135 end over a time interval  $dt$  will be  $p_{\text{off}} = r_{\text{off}} dt = p_{\text{hyd}} p_{\text{dis}}$ , where  $p_{\text{hyd}}$  is the probability  
136 that the tail monomer has hydrolysed its nucleotide and  $p_{\text{dis}}$  the probability that such a  
137 monomer dissociates over the time interval. We can then write  $p_{\text{dis}} = r_{\text{dis}} dt$  with  $r_{\text{dis}}$  the  
138 dissociation rate. Hydrolysis of the nucleotide can only happen within the filament, as it  
139 required the full monomer-monomer interface and, because all non-hydrolysed interfaces in  
140 the polymer are the same, should occur at a constant hydrolysis rate  $r_{\text{hyd}} = 1/\tau_{\text{hyd}}$ . As a  
141 result, the probability that a monomer's nucleotide has been hydrolysed will increase over  
142 time as  $p_{\text{hyd}}(t) = 1 - \exp(-t/\tau_{\text{hyd}})$ , where  $t$  is the time the monomer has spent in the filament.  
143 Putting everything together, we get that the depolymerisation rate  $r_{\text{off}}$  generally depends  
144 on  $r_{\text{dis}}$  and  $\tau_{\text{hyd}}$  as  $r_{\text{off}}(t) = r_{\text{dis}} [1 - \exp(-t/\tau_{\text{hyd}})]$ .

145 In summary, hydrolysis renders the depolymerisation rate time-dependent, increasing  
146 from 0 to  $r_{\text{dis}}$  over a typical time  $\tau_{\text{hyd}}$  as the time monomers spend in the filament increases.  
147 Consequently, as we show in Figure S3b given a growth rate  $r_{\text{on}}$ , there will only be one time  $t^*$   
148 for which the two rates become equal ( $r_{\text{off}}(t^*) = r_{\text{on}}$ ) and stable treadmilling is achieved. For  
149 shorter times  $r_{\text{off}}(t < t^*) < r_{\text{on}}$  and the filament grows and for longer times  $r_{\text{off}}(t > t^*) > r_{\text{on}}$

150 and the filament shrinks. Note that this time dependency of the depolymerisation rate,  
 151 which results from the hydrolysis, is a hallmark of treadmilling, allowing for filament length  
 152 control [17]. Importantly, a sufficiently large value of  $r_{\text{dis}}$  is required for stable treadmilling,  
 153 as  $r_{\text{dis}} < r_{\text{on}}$  implies  $r_{\text{off}}(t) < r_{\text{on}}$  for all times. Assuming dissociation is sufficiently fast then,  
 154 we expect the filament size will be controlled by both  $r_{\text{on}}$  and  $\tau_{\text{hyd}}$  while the treadmilling  
 155 speed will be determined solely by the growth rate  $r_{\text{on}}$  (Figure S3c).

156 This analysis is consistent with the current literature on FtsZ, where the hydrolysis has  
 157 been estimated to be much slower than the dissociation ( $\tau_{\text{hyd}} \gg 1/r_{\text{dis}}$ ). Corbin and Erickson  
 158 fit these parameters to  $\tau_{\text{hyd}} = 2.5 - \infty$  s and  $r_{\text{dis}} = 6.5 \text{ s}^{-1}$  respectively [16] while Loose and  
 159 Mitchison measure  $\tau_{\text{hyd}} = 12$  s and  $r_{\text{dis}} = 13.25 \text{ s}^{-1}$  [1]. According to this picture then, given  
 160 that hydrolysis is slow, it would take a long time for FtsZ monomers to hydrolyse their  
 161 nucleotide and become available for detachment, but the depolymerisation rate would still  
 162 be high, matching the growth rate  $r_{\text{on}}$ .

163 Taking all this into consideration and striving for simplicity in our model, we decided  
 164 to retain only one parameter to control depolymerisation:  $\tau_{\text{det}}$ , the typical time over which  
 165 monomers become available for detachment. We implement it into our model through the  
 166 probability for removing a tail monomer over timesteps of size  $dt = 0.1$  s:  $p_{\text{off}}(t_{\text{tail}}, \tau_{\text{det}}) =$   
 167  $1 - e^{-t_{\text{tail}}/\tau_{\text{det}}}$ , where  $t_{\text{tail}}$  is the time since it was added to the filament. In this way, the  
 168 depolymerisation rate retains the time-dependency resulting from hydrolysis, as discussed  
 169 above. Note that  $\tau_{\text{det}}$  corresponds to  $\tau_{\text{hyd}}$  for fast dissociation ( $r_{\text{dis}} = 10 \text{ s}^{-1}$ ) and can be  
 170 related to  $\tau_{\text{hyd}}$  and  $r_{\text{dis}}$  by equating the time  $t^*$  for stable treadmilling in both cases, yielding:  
 171  $\tau_{\text{det}} \log(1 - r_{\text{on}}/10) = \tau_{\text{hyd}} \log(1 - r_{\text{on}}/r_{\text{dis}})$ .

172 Nonetheless, for the sake of completeness, in Figure S3d-e we take a step further and  
 173 implement the two depolymerisation parameters –  $r_{\text{dis}}$  and  $\tau_{\text{hyd}}$  – explicitly in our Molecular  
 174 Dynamics model, adding another level of complexity. The simulations are carried out in  
 175 the same conditions as described previously for single filament simulations (Figure 1 of

176 the main manuscript), only now  $p_{\text{off}}(t_{\text{tail}}, r_{\text{dis}}, \tau_{\text{hyd}}) = r_{\text{dis}} (1 - e^{-t_{\text{tail}}/\tau_{\text{hyd}}}) dt$ . All the data  
177 shown in Figure S3d-e corresponds to a fixed growth rate  $r_{\text{on}} = 6 \text{ s}^{-1}$ . Consistent with our  
178 predictions from above, only when the dissociation rate  $r_{\text{dis}}$  is large do these filaments achieve  
179 stable treadmilling where the filament size fluctuates around a constant value which in turn  
180 depends on  $\tau_{\text{hyd}}$ . Otherwise, the depolymerisation rate is always too low and the filaments  
181 grow indefinitely. Note as well that the treadmilling velocity – measured as the filament  
182 head velocity – is independent of both  $r_{\text{dis}}$  and  $\tau_{\text{hyd}}$ , as expected. Altogether, these results  
183 and analysis showcase that our model simplification, where the filament depolymerisation  
184 only depends on the time it takes for filaments to become available for detachment ( $\tau_{\text{det}}$ ), is  
185 a sensible one.

#### 186 **D. Single filament analysis**

187 To test the validity of our modelling approach we simulate single filaments treadmilling in  
188 a box of size  $L = 400\sigma$  for a wide range of parameters  $\{r_{\text{on}}, \tau_{\text{det}}\}$  over  $t_{\text{max}} = 300$  seconds  
189 to guarantee proper steady-state sampling of their dynamic properties. The structural pa-  
190 rameters of the filaments are kept constant at  $K_{\text{bond}} = 10^3 k_{\text{B}}T$  and  $K_{\text{bend}} = 10^5 k_{\text{B}}T$ , thus  
191 simulating stiff and straight filaments. Simulations are initiated with a single filament nu-  
192 cleus in the center of the box and no new dimer nucleation is considered ( $r_{\text{nuc}} = 0 \text{ s}^{-1}$ ). We  
193 characterise the steady-state filament size and its fluctuations over the last 2 minutes of sim-  
194 ulation ( $t \in (180, 300)$  seconds):  $\bar{N} = \langle N_t \rangle_{t \in (180, 300)}$ ,  $\sigma_N^2 = \langle (N_t - \bar{N})^2 \rangle_{t \in (180, 300)}$ . In Figure  
195 S4a-b we present how the intrinsic size  $N_c = -r_{\text{on}}\tau_{\text{det}}\log(1 - p_{\text{on}})$  and the steady-state size  
196  $\bar{L} = \sigma\bar{N}$  each depend on the model parameters. Note that they display a similar dependency  
197 and, as shown in Figure 1 of the main text the two variables collapse onto each other, show-  
198 ing that the steady-state size of treadmilling filaments can be precisely controlled by the two  
199 parameters  $r_{\text{on}}$  and  $\tau_{\text{det}}$ . In Figure S6 we illustrate how the rescaled size fluctuations  $\sigma_N/\bar{N}$   
200 are controlled by the intrinsic size  $N_c$ , such that as  $N_c$  increases treadmilling becomes more

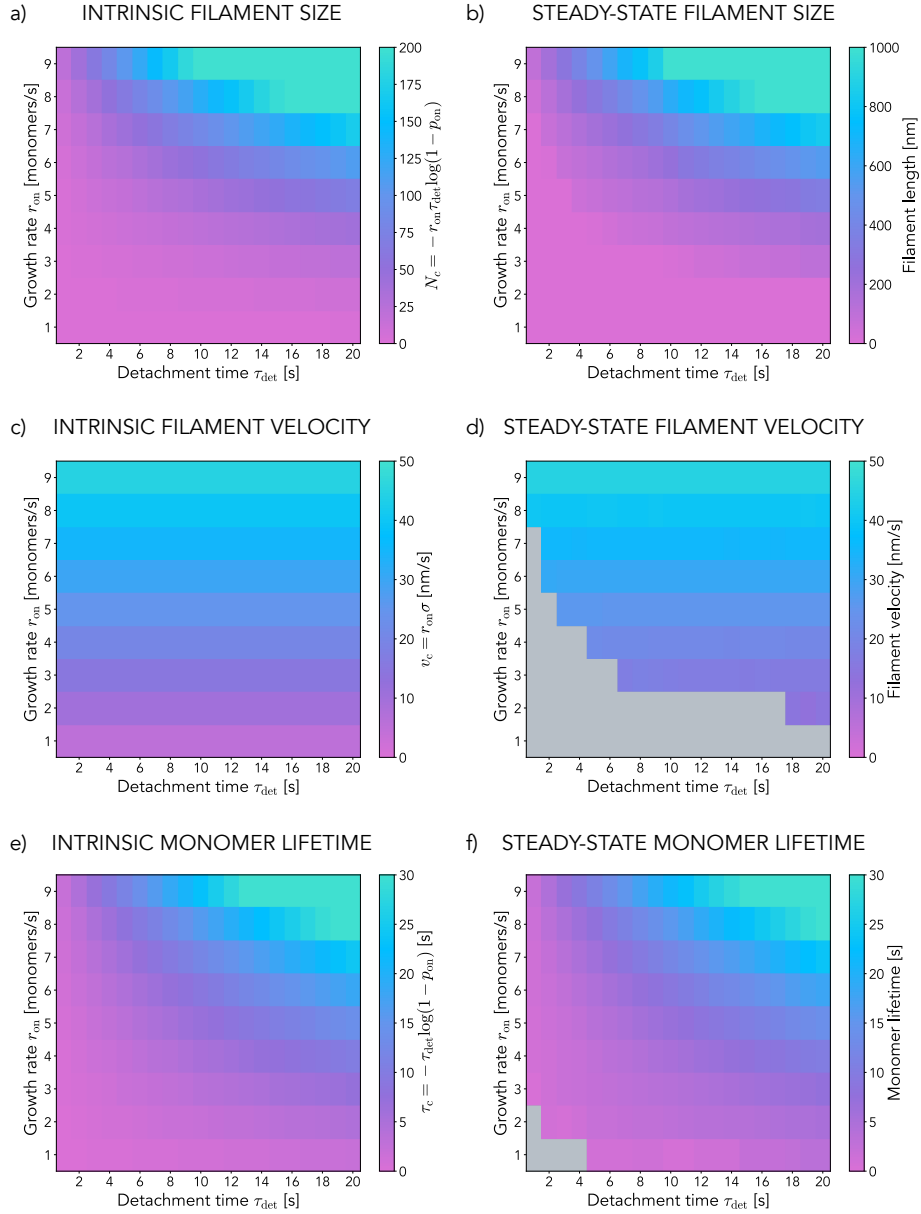

FIG. S4. **Single filament properties** **a)** Intrinsic filament size  $N_c$  dependency on the two model parameters  $\{r_{\text{on}}, \tau_{\text{det}}\}$ . **b)** Steady-state filament length dependency on the two model parameters  $\{r_{\text{on}}, \tau_{\text{det}}\}$ . **c)** Intrinsic filament velocity  $v_c$  dependency on the two model parameters  $\{r_{\text{on}}, \tau_{\text{det}}\}$ . **d)** Steady-state filament velocity dependency on the two model parameters  $\{r_{\text{on}}, \tau_{\text{det}}\}$ . **e)** Intrinsic monomer lifetime  $\tau_c$  dependency on the two model parameters  $\{r_{\text{on}}, \tau_{\text{det}}\}$ . **f)** Steady-state monomer lifetime dependency on the two model parameters  $\{r_{\text{on}}, \tau_{\text{det}}\}$ . Values in panels **b)**, **d)** and **f)** correspond to the average over 20 replicas for each parameter set.



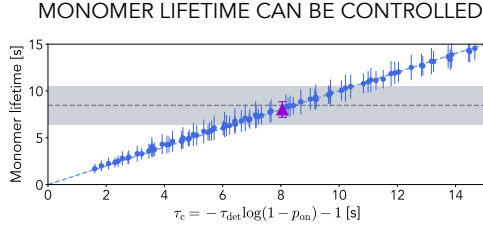

FIG. S5. **Monomer lifetimes** Average monomer lifetimes for different values of  $\{r_{\text{on}}, \tau_{\text{det}}\}$  plotted against the corresponding expected lifetime  $\tau_c$ . Each point corresponds to the average over 20 replicas for each parameter set, the error bars are the standard deviation. The dashed line is  $y = x$ .

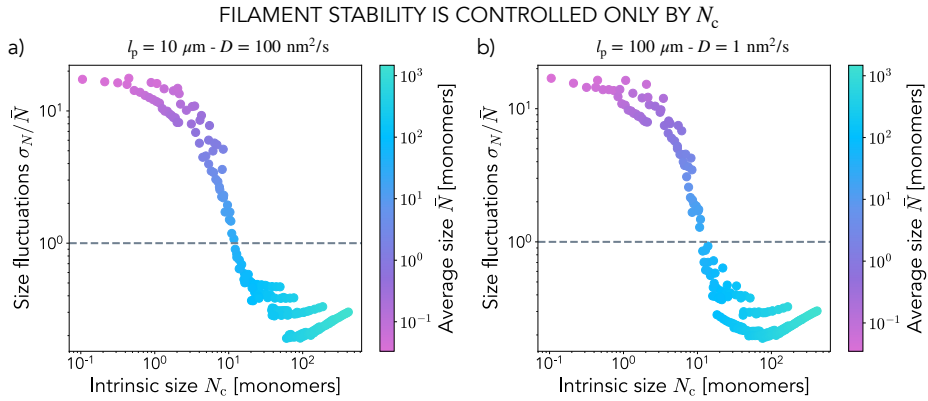

FIG. S6. **Treadmilling stability is controlled by the intrinsic size** Scatter plot of the rescaled filament size fluctuations  $\sigma_N/\bar{N}$  against the intrinsic size  $N_c = -r_{\text{on}}\tau_{\text{det}}\log(1 - p_{\text{on}})$  coloured according to the average filament size  $\bar{N}$ . As  $N_c \gg 10$  monomers the size fluctuations become negligible, indicating a highly stable treadmilling regime.

201 stable and fluctuations are negligible compared to the filament size. Similarly, we also char-  
 202 acterise the steady-state velocity of filaments as the average displacement of the filament  
 203 head (again over the last two minutes of simulation):  $\bar{v} = \langle dr_{\text{head}}/dt \rangle_{t \in (180,300)}$  which, as  
 204 shown in Figure S4c-d and Figure 1 of the main text only depends on the imposed growth  
 205 rate as  $\bar{v} = v_c = r_{\text{on}}\sigma$ . Finally, we can also measure the average monomer lifetime over the  
 206 course of the simulation  $\bar{T} = \langle t_{\text{depol}} - t_{\text{pol}} \rangle$  which again can be predicted from the model  
 207 parameters as  $\tau_c = -\tau_{\text{det}}\log(1 - p_{\text{on}})$ , as illustrated by Figure S4e-f and in Figure S5. All  
 208 statistics are performed over  $N = 20$  different replicas of the system for each parameter set  
 209  $\{r_{\text{on}}, \tau_{\text{det}}\}$ .

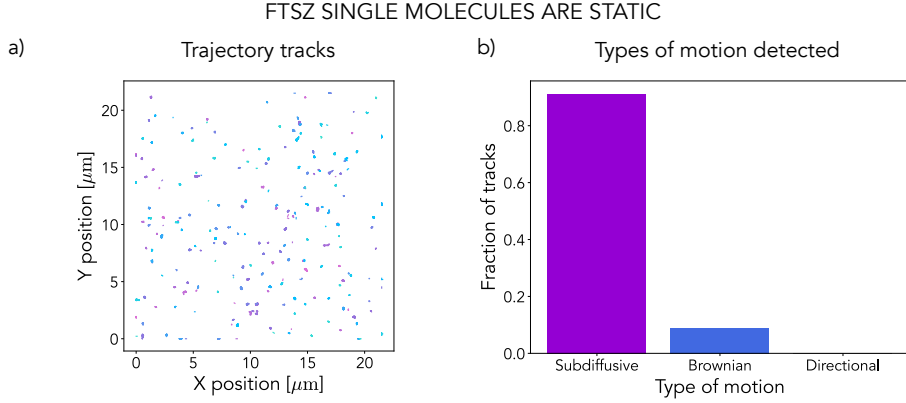

FIG. S7. **Single FtsZ monomers are static** **a)** Single FtsZ molecules trajectory tracks ( $N = 288$ ). **b)** Types of motion detected (fraction of total tracks) after analysis of the collected tracks ( $N = 136$ ).

## 210 E. Collective dynamics analysis

211 We characterise the collective behaviour of treadmilling filaments in systems of size  $L = 200\sigma$   
 212 in which polymers with  $K_{\text{bond}} = 10^3 k_B T$  and  $K_{\text{bend}} = 10^3 - 10^4 k_B T$  ( $l_p = 10 - 100 \mu\text{m}$ ) are  
 213 nucleated in the form of dimers at constant rates  $r_{\text{nuc}} = 1 \text{ s}^{-1}$  or  $r_{\text{nuc}} = 5 \text{ s}^{-1}$  and evolve under  
 214 kinetic parameters  $\{r_{\text{on}}, \tau_{\text{det}}\}$  for  $t_{\text{max}} = 20$  minutes. Because we are comparing with High  
 215 Speed Atomic Force Microscopy data from reconstituted *E. coli* FtsZ on supported lipid  
 216 bilayers (SLBs), for which the monomer diffusion coefficient was estimated to be around  
 217  $D = 10^{-4} \mu\text{m}^2/\text{s}$  [18], in our simulations we also set  $D = 100 \text{ nm}^2/\text{s}$ . As exemplified in  
 218 Figure S8, all relevant system variables stabilise around constant values after a few minutes,  
 219 indicating that treadmilling systems generally relax to a well-defined collective steady state  
 220 characterised by constant values of the surface density, filament number and average size  
 221 and nematic and polar order parameters  $S$  and  $P$  respectively. We characterise this steady-  
 222 state for different kinetic parameters by averaging the relevant variables in time over the last  
 223 10 minutes of simulation. We define the surface density  $\rho_t = M_t/L^2$  where  $M_t$  is the total  
 224 number of monomers in the system at time  $t$ . Similarly, we define  $S_t = 0.5(3\langle(\mathbf{u}_i \mathbf{u}_j)^2\rangle_{\{i,j\}} - 1)$   
 225 and  $P_t = \langle\mathbf{u}_i \mathbf{u}_j\rangle_{\{i,j\}}$ , where  $\mathbf{u}_i$  is the unit vector along the direction of bond  $i$ ,  $\langle\rangle_{\{i,j\}}$  indicates

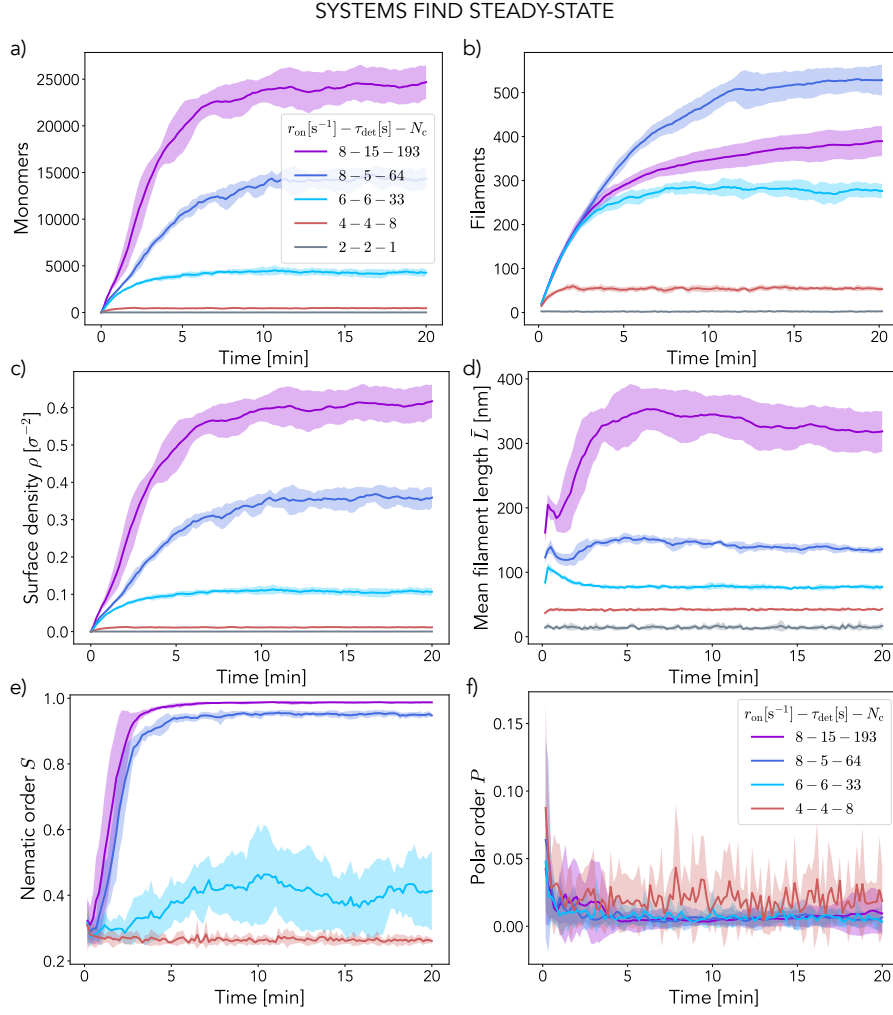

FIG. S8. **Collective steady-state evolution of treadmilling systems** Temporal evolution of different relevant system variables in five representative systems of treadmilling filaments showing stabilisation around constant values after a few minutes. **a)** Total number of monomers. **b)** Total number of filaments. **c)** Surface density of monomers. **d)** Average filament length. **e)** Nematic order  $S$ . **f)** Polar order  $P$ . Each curve is the average over  $N = 10$  replicas (shaded region is the standard deviation) for different kinetic parameters  $\{r_{\text{on}}, \tau_{\text{det}}\}$  and hence intrinsic size  $N_c$  (see legend). In all cases  $r_{\text{nuc}} = 1 \text{ s}^{-1}$ ,  $L = 200\sigma = 1 \mu\text{m}$ ,  $l_p = 10 \mu\text{m}$  and  $D = 100 \text{ nm}^2/\text{s}$ .

226 the average over all pairs of bonds and the subscript  $t$  indicates the time dependence of  $S$   
 227 and  $P$ .

228 As indicated in Figure 2 of the main text, we find that treadmilling systems in the right  
 229 kinetic regime will spontaneously organise into dynamic structures with high nematic order

230 and surface density. This transition depends only on the kinetic parameters  $r_{\text{on}}$  and  $\tau_{\text{det}}$ ,  
 231 and appears to be independent of the nucleation rate  $r_{\text{nuc}}$ , as shown in Figure S9. Indeed,  
 232 we find that the steady-state values of  $S$  and  $\rho$  are very similar for the two different values  
 233 of  $r_{\text{nuc}}$  studied and the dependency on the kinetic parameters remains largely the same.  
 234 Furthermore, these two quantities are dynamically coupled, as indicated in Figure 2 of the  
 235 main text as well, with only highly ordered systems achieving large surface densities. The  
 236 apparently complex dependency of  $S$  and  $\rho$  on  $r_{\text{on}}$  and  $\tau_{\text{det}}$  can in fact be better understood  
 237 as being controlled only by the intrinsic filament size  $N_c$  (a measure of the persistence of  
 238 the treadmilling kinetics) with a clear transition towards order and high density around  
 239  $N_c \sim 100$  monomers (see Figure S10 and Figure 2 in the main text). Importantly, we find  
 240 that this transition is largely independent, not only of the nucleation rate  $r_{\text{nuc}}$ , but also of  
 241 structural and dynamical properties of the filaments as changing the stiffness of these ( $l_p$ )  
 242 or the diffusion coefficient of the monomers ( $D$ ) does not affect the transition much (Figure  
 243 S10).

244 Like in single filament simulations, we define the treadmilling velocity as the average  
 245 displacement of the filament head  $\bar{v} = \langle dr_{\text{head}}/dt \rangle$ , now averaging over the full lifetime of the  
 246 filament. To measure individual alignment of filaments with the bulk we define the individual  
 247 nematic order parameter  $S_i = 0.5(3\langle (\mathbf{u}_j \mathbf{u}_k)^2 \rangle_{\{j,k\} \in i} - 1)$  where we average over all pairs of  
 248 bond directors  $\{j, k\}$  which include a bond belonging to filament  $i$ . With this measure,  
 249  $S_i = -0.5$  means the filament is perpendicular to the average collective orientation and  
 250  $S_i = 1.0$  that the filament is parallel to the bulk of the system. With this measure we can then  
 251 measure average filament lifetimes and velocities for different degrees of alignment (different  
 252 values of  $S_i$ ). As shown in Figure 2 of the manuscript and Figure S11, this unveils that  
 253 aligned filaments in treadmilling systems live longer and move faster than their misaligned  
 254 counterparts on average, which leads to global alignment and nematic order as misaligned  
 255 filaments die out over time (see Supplementary Movie 7 for an illustrative example).

256 We define the relaxation times to steady-state as the time it takes for the nematic order  
 257 parameter to stabilise. To find it we compare the instantaneous value of  $S_t$  measured every  
 258 10 seconds over each trajectory with the long time average  $S^*$  from those times. We thus  
 259 define  $S^*(t) = \langle S_{t'} \rangle_{\{t' \geq t\}}$  together with its error  $\sigma_S(t)$  defined from  $\sigma_S^2(t) = \langle S_{t'}^2 - S^*(t) \rangle_{\{t' \geq t\}}$ .  
 260 We can then define the relaxation time  $T_{\text{rel}}$  as the first time  $t$  for which the difference between  
 261 the instantaneous value and long-time average of the nematic order is smaller than the error:  
 262  $T_{\text{rel}} = \min(t \iff \|S_t - S^*(t)\| < \sigma_S(t))$  (Figure S12a). From such measurements we can  
 263 extract probability distribution functions for the relaxation times at different nucleation  
 264 rates, revealing that even for very large  $r_{\text{nuc}}$  model treadmilling filaments display  $T_{\text{rel}}$  on the  
 265 order of minutes (Figure S12b).

266 To characterise the locality of the two order parameters  $S$  and  $P$  we compute these for  
 267 different perpendicular distances  $r_+$  between filaments over the course of a simulation. We  
 268 define  $r_+$  as the distance between monomers  $i$  and  $j$  along the perpendicular direction to  
 269 the local filament director at monomer  $i$  ( $u_i$ ). We average over  $N = 10^6$  pairs of monomers  
 270 binning them by  $r_+$  (bin size  $\Delta r_+ = \sigma$ ) in a single frame of a simulation and consider frames  
 271 at 1 minute intervals for long times to focus on the steady-state regime. As shown in Figure  
 272 S13, the polar order decays very quickly as we move away from a filament while the nematic  
 273 order remains high for large distances. This feature is characteristic of the polar lanes that  
 274 form in the ordered regime of treadmilling, whereby parallel alignment only spans a few  
 275 filaments that form a single lane. Note that this behaviour is consistent over time as lanes  
 276 can grow or shrink but the system never evolves to display global polar order. In Figure S13  
 277 we focus on a simulation for  $r_{\text{on}} = 8 \text{ s}^{-1}$  and  $\tau_{\text{det}} = 15 \text{ s}$  for the same conditions as in Figure  
 278 2 of the main text ( $L = 200\sigma$ ,  $l_p = 10 \text{ }\mu\text{m}$  and  $D = 100 \text{ nm}^2/\text{s}$ ).

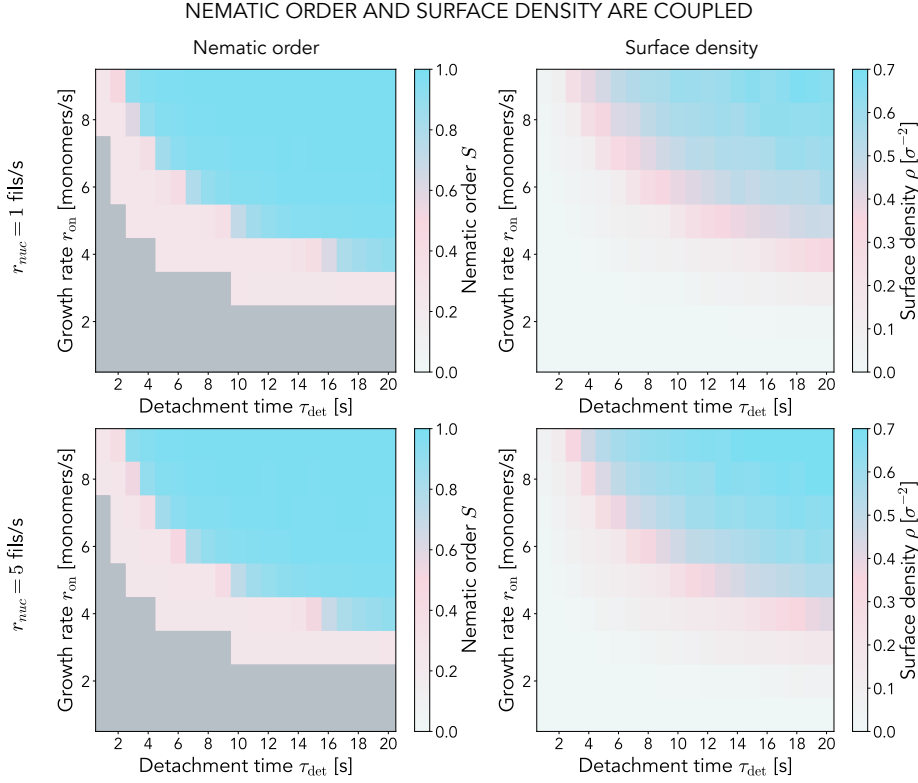

FIG. S9. **Collective filament properties are independent of the nucleation rate** Dependence of the nematic order  $S$  and surface density  $\rho$  on the two kinetic parameters  $\{r_{\text{on}}, \tau_{\text{det}}\}$  for  $r_{\text{nuc}} = 1 \text{ s}^{-1}$  (top row) and  $r_{\text{nuc}} = 5 \text{ s}^{-1}$  (bottom row). The gray area in the nematic order plots corresponds to non-treadmilling systems that remain essentially empty. Each point corresponds to the average over  $N = 10$  replicas in steady state ( $t > 10$  minutes out of 20 total) for systems of size  $L = 200\sigma$ .  $l_p = 10 \mu\text{m}$  and  $D = 100 \text{ nm}^2/\text{s}$ .

279 **F. Death by misalignment through treadmilling kinetics drives ordering in dilute**  
 280 **conditions as well**

281 In the results presented in the main text for unbiased collective treadmilling dynamics we  
 282 observe that ordered systems tend to build up their surface density to relatively high values  
 283 (as much as  $\rho \sim 0.6 \sigma^{-2}$ ). However, FtsZ numbers in bacterial cells are typically estimated  
 284 around  $N_{\text{FtsZ}} \sim 5000$ , of which roughly 30 – 40% are in the Z-ring [19]. For rings roughly  
 285  $\sim 200 \text{ nm}$  wide in cells  $1 \mu\text{m}$  in diameter such estimates should limit the surface density  
 286 to  $\rho_{\text{max}} \sim 0.08 \sigma^{-2}$ . Consequently, we thought it would be important to test whether the

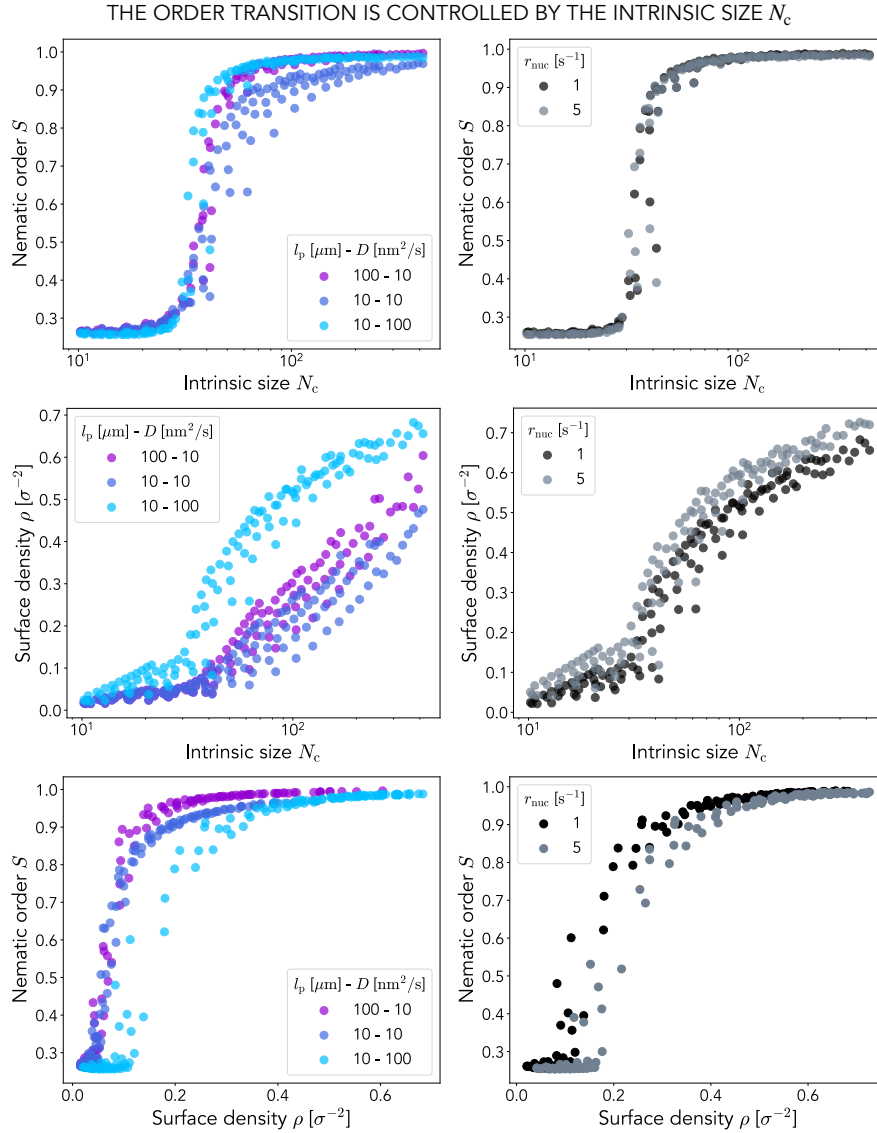

FIG. S10. **Collective order and density are controlled by the intrinsic filament size**  
Top row: Nematic order  $S$  at steady state plotted against the intrinsic filament size  $N_c$  for different conditions. Middle row: Surface density  $\rho$  at steady state plotted against the intrinsic filament size  $N_c$  for different conditions. Bottom row: Coupling of nematic order  $S$  and surface density  $\rho$  at steady state. Left column: Comparing different filament persistence lengths  $l_p$  and monomer diffusion coefficients  $D$  (see legend). In all cases  $r_{\text{nuc}} = 1 \text{ s}^{-1}$ . Right column: Comparing different nucleation rates  $r_{\text{nuc}}$  (see legend). In all cases  $l_p = 10 \mu\text{m}$  and  $D = 100 \text{ nm}^2/\text{s}$ . Each point corresponds to the steady state ( $t > 10$  minutes out of 20) average over  $N = 10$  replicas for each kinetic parameter combination  $\{r_{\text{on}}, \tau_{\text{det}}\} \rightarrow N_c$ . In all cases  $L = 200\sigma$ .

## ALIGNED FILAMENTS TREADMILL FASTER AND LONGER

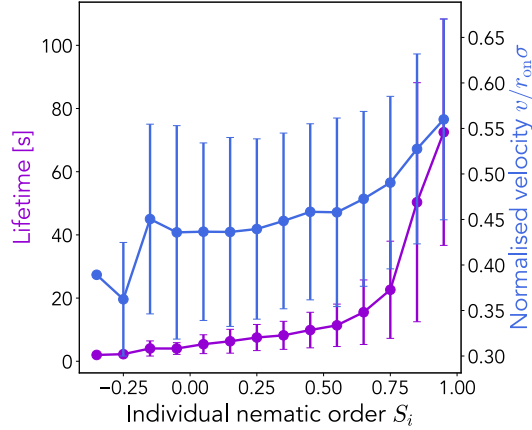

FIG. S11. **Aligned filaments treadmill longer and faster** Filament lifetime and normalised velocity  $v/r_{\text{on}}\sigma$  for different levels of alignment (characterised by the individual nematic order  $S_i$ ). We consider only simulations for  $N_c \geq 100$  ( $N = 10$  replicas per parameter set), which results in 226077 data points (filaments) in total binned in  $S_i$  with width 0.1. Dots are the average of each bin and error bars the standard deviation. We use  $r_{\text{on}} = 8 \text{ s}^{-1}$ ,  $\tau_{\text{det}} = 15 \text{ s}$  and  $r_{\text{nuc}} = 1 \text{ s}^{-1}$  for  $l_p = 10 \text{ }\mu\text{m}$  and  $D = 100 \text{ nm}^2/\text{s}$  in a system of size  $L = 200\sigma$ .

## STEADY-STATE RELAXATION TAKES SEVERAL MINUTES FOR ALL PARAMETERS

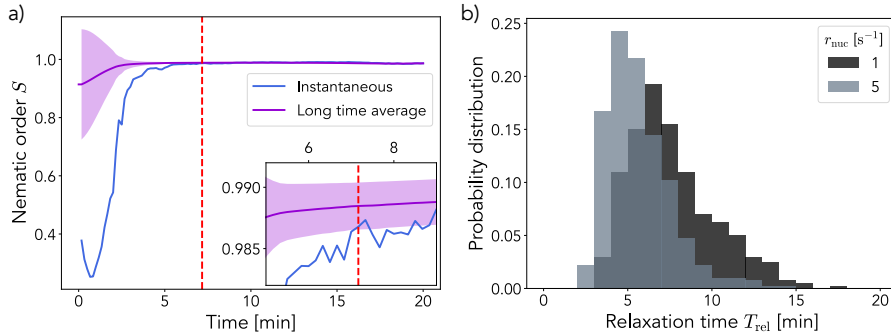

FIG. S12. **Relaxation to steady-state occurs on the order of minutes** **a)** Example trajectory of the nematic order  $S_t$  and its long time average  $S^*(t)$  (error  $\sigma_S(t)$  is shown by the shaded region) considered to find the relaxation time  $T_{\text{rel}}$  (dashed vertical line). The inset is a zoom-in around  $T_{\text{rel}}$ . **b)** Probability distribution of relaxation times to nematic order steady-state for two different nucleation rates  $r_{\text{nuc}}$ . The distributions were obtained by running statistics over 40 different parameter sets that order ( $N_c \geq 100$ ) and  $N = 10$  replicas for each, resulting in 400 data points per curve. In all cases  $l_p = 10 \text{ }\mu\text{m}$ ,  $D = 100 \text{ nm}^2/\text{s}$  and  $L = 200\sigma$ .



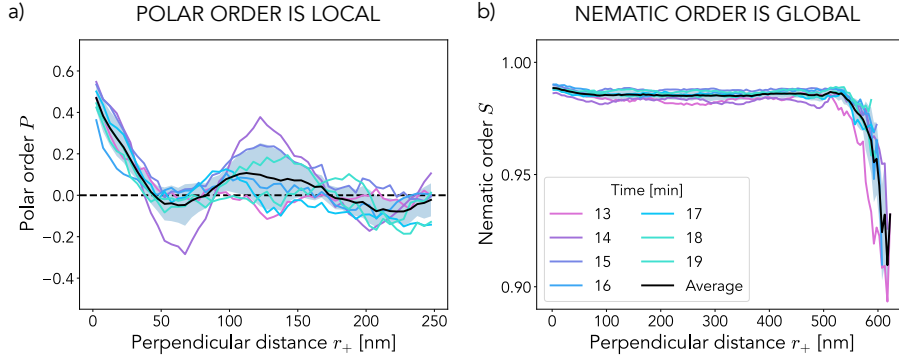

FIG. S13. **Polar order is local while nematic order is global** Polar order parameter  $P$  (panel a) and nematic order parameter  $S$  (panel b) measured between filaments for different perpendicular distances  $r_+$  at several times during the simulation ( $r_{\text{on}} = 8 \text{ s}^{-1}$ ,  $\tau_{\text{det}} = 15 \text{ s}$ ,  $r_{\text{nuc}} = 1 \text{ s}^{-1}$ ). A consistent sharp decay at small distances emerges for  $P$  independent of time while  $S$  remains high at large distances. Different colours correspond to different times and the black line represents the average over these (the shaded region indicates the error). For each curve  $N = 10^6$  pairs of bonds were sampled in the system ( $L = 200\sigma$ ,  $l_p = 10 \text{ }\mu\text{m}$ ,  $D = 100 \text{ nm}^2/\text{s}$ ).

287 mechanism we describe in this work, whereby filaments collectively organise via the death  
 288 of misaligned ones, still holds at more *in vivo*-like dilute conditions. For this purpose we  
 289 repeated the same simulations as presented in Figure 2 of the main text now constraining our  
 290 system to a maximum number of particles  $N_{\text{max}} = 3200$  which, for systems of  $L = 200\sigma$ , gives  
 291  $\rho_{\text{max}} \sim 0.08 \text{ }\sigma^{-2}$ . In this case we fix  $K_{\text{bend}} = 10^4 k_B T$  ( $l_p = 100 \text{ }\mu\text{m}$ ) and  $D = 10 \text{ nm}^2/\text{s}$ . We  
 292 find that, if we simulate treadmilling kinetics in the ordered region of the parameter space  
 293 dilute systems still order, reaching large values of the nematic order  $S$  while saturating their  
 294 surface density to  $\rho_{\text{max}} \sim 0.08 \text{ }\sigma^{-2}$  (Figure S14a-b). Here as well we can characterise the  
 295 dependence of filament lifetimes and velocities on their individual alignment  $S_i$ , which gives  
 296 the same results as for the unconstrained simulations: filaments on average live longer and  
 297 treadmill faster when they are more aligned with their surroundings, a trademark of the  
 298 mechanism at play (Figure S14c-d). These results thus show that treadmilling filaments  
 299 need not be at large surface density to order. Instead, the ordering process is driven solely  
 300 by their kinetics and in turn allows for a surface density buildup if no limits on concentration  
 301 are set.

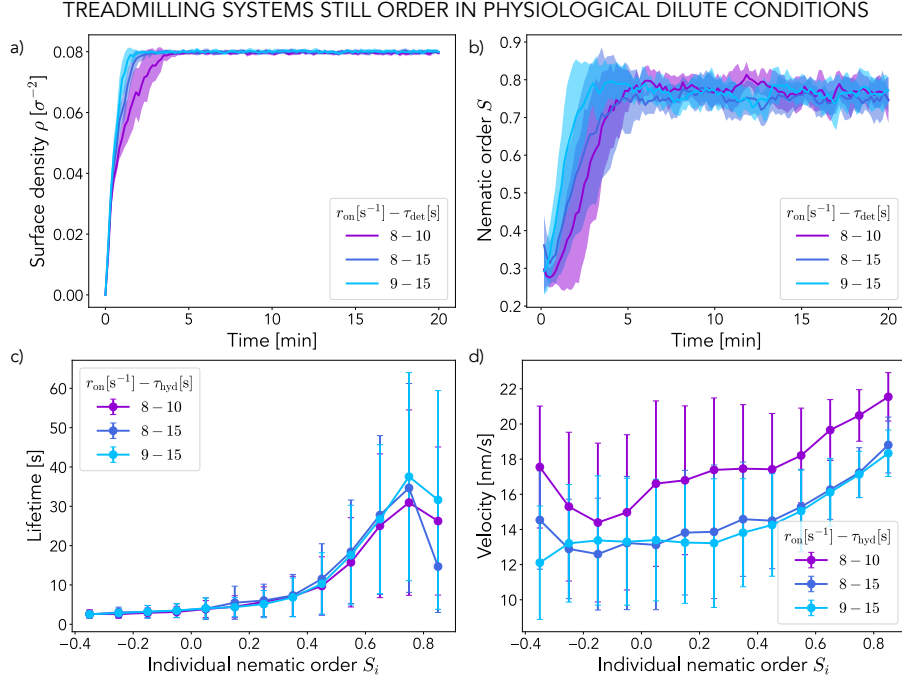

FIG. S14. **Model treadmilling filament systems constrained to a dilute regime still order by misaligned filaments dying out** a-b) Time evolution of the surface density  $\rho$  and nematic order  $S$  respectively. The system saturates to  $\rho_{\max} = 0.08 \sigma^{-2}$  but still reaches a globally ordered steady state  $S_{t \rightarrow \infty} \sim 0.8$ . Solid lines are the average over  $N = 10$  different replicas and the shaded region corresponds to the standard deviation. c-d) Average filament lifetimes and velocities respectively for different levels of individual alignment (characterised by  $S_i$ ). Aligned filaments treadmill faster and display live longer on average. Points are the average for each alignment bin (width 0.1) and error bars correspond to the standard deviation. Statistics over  $N = 10$  replicas. Different kinetic parameters are coloured according to the legend.  $L = 200\sigma$ ,  $l_p = 100 \mu\text{m}$ ,  $D = 10 \text{ nm}^2/\text{s}$ .

### 302 G. Treadmilling is essential for ordering

303 We provide further proof of the treadmilling origin of the order transition we observe in  
 304 our model by artificially arresting the dynamics at different stages along relaxation. We  
 305 implement this by turning off filament shrinking ( $r_{\text{off}} = 0$ ) at different arrest times  $t_{\text{arr}}$ . We  
 306 perform simulations in a system of size  $L = 200\sigma$  for two kinetic parameter sets – one that  
 307 remains disordered and one that orders ( $\{r_{\text{on}} = 4 \text{ s}^{-1}, \tau_{\text{det}} = 4 \text{ s}\}$  and  $\{r_{\text{on}} = 8 \text{ s}^{-1}, \tau_{\text{det}} = 15 \text{ s}\}$ )  
 308 over 10 minutes. We find that in the absence of treadmilling the system freezes and saturates

ARRESTING TREADMILLING PREVENTS ORDERING OF FILAMENTS

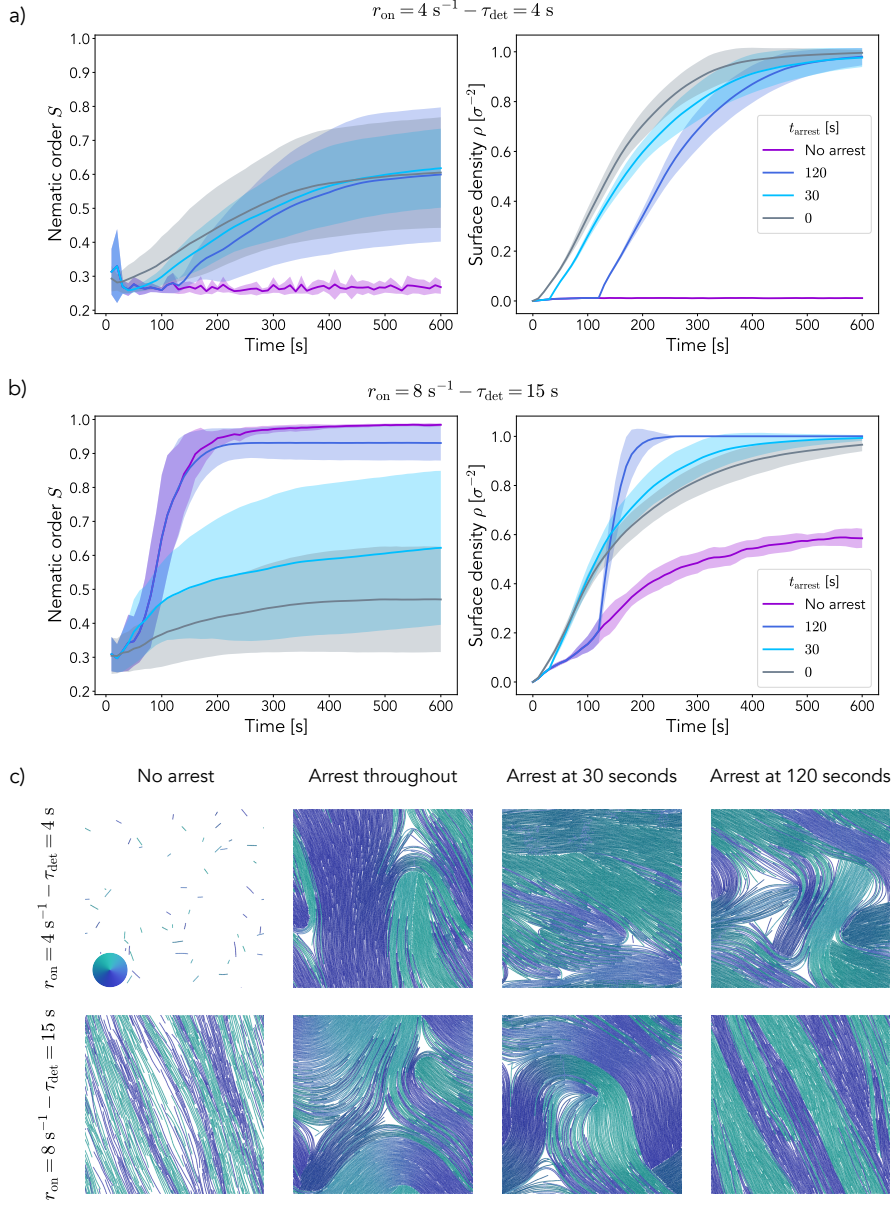

FIG. S15. **Arrested treadmilling leads to disorder** **a,b)** Surface density  $\rho$  and nematic order  $S$  curves over time for different scenarios of treadmilling arrest (see legend,  $t_{\text{arr}}$  is the time when the off rate is killed). We consider two different kinetic parameters,  $r_{\text{on}} = 4 \text{ s}^{-1}$  and  $\tau_{\text{det}} = 4 \text{ s}$  (a) and  $r_{\text{on}} = 8 \text{ s}^{-1}$  and  $\tau_{\text{det}} = 15 \text{ s}$  (b) normally resulting in disorder and order respectively. Curves correspond to the average over  $N = 10$  replicas, the shaded region is the standard deviation. **c)** Representative snapshots of the system after 10 minutes for the different kinetic parameters and arrest times. Filaments are coloured according to their orientation (see wheel). In all cases  $L = 200\sigma$ ,  $l_p = 10 \mu\text{m}$  and  $D = 100 \text{ nm}^2/\text{s}$ .

309 in a disordered manner as a result of turnover inhibition. For systems that remain disordered  
 310 in steady-state arresting treadmilling only has the effect of freezing the system and saturating  
 311 the surface density  $\rho$ , but the nematic order  $S$  remains low, albeit slightly larger than for  
 312 unperturbed treadmilling as thermal fluctuations and collisions can foster local alignment  
 313 for long-lived filaments (Figure S15a,c). For systems that order in steady-state when their  
 314 dynamics are unperturbed we find that arresting treadmilling decreases the order as newly  
 315 nucleated defects are not dissolved. Consequently, we find that the earlier we kill the off  
 316 rate the more disordered the system becomes as there is more room for defects and that if  
 317 treadmilling is arrested after high order is reached then the system remains ordered (Figure  
 318 S15b,c). Here again kinetic arrest results in frozen systems that saturate the surface density  
 319  $\rho$ .

## 320 H. High-speed AFM data

321 Raw High-Speed Atomic Force Microscopy (HS-AFM) images (see Section M) were analysed  
 322 using the OrientationJ plugin for imageJ [20] to obtain vector fields for each frame after  
 323 adequate thresholding (Figure S16b). Only pixels with high intensity ( $I > 122.5$ ,  $I_{\max} =$   
 324  $255$ ) are retained for nematic analysis. We define the surface density from AFM images as  
 325  $\rho_t = \sum_{I > 122.5} \text{pxl} / N_{\text{pxl}}$  where  $N_{\text{pxl}}$  is the total number of pixels in the frame. Similarly to  
 326 simulations analysis, we define the nematic order parameter as  $S_t = \langle 0.5(3(\mathbf{u}_i \mathbf{u}_j)^2 - 1) \rangle_{\{i,j\}}$   
 327 where  $\{i,j\}$  denotes all pairs of vectors in the high intensity regions. We perform this analysis  
 328 both on wild-type *E. coli* FtsZ and the L169R mutant that displays inhibited GTPase activity  
 329 and turnover [21] reconstituted on supported lipid bilayers (see Figure 2 of the manuscript  
 330 for results).

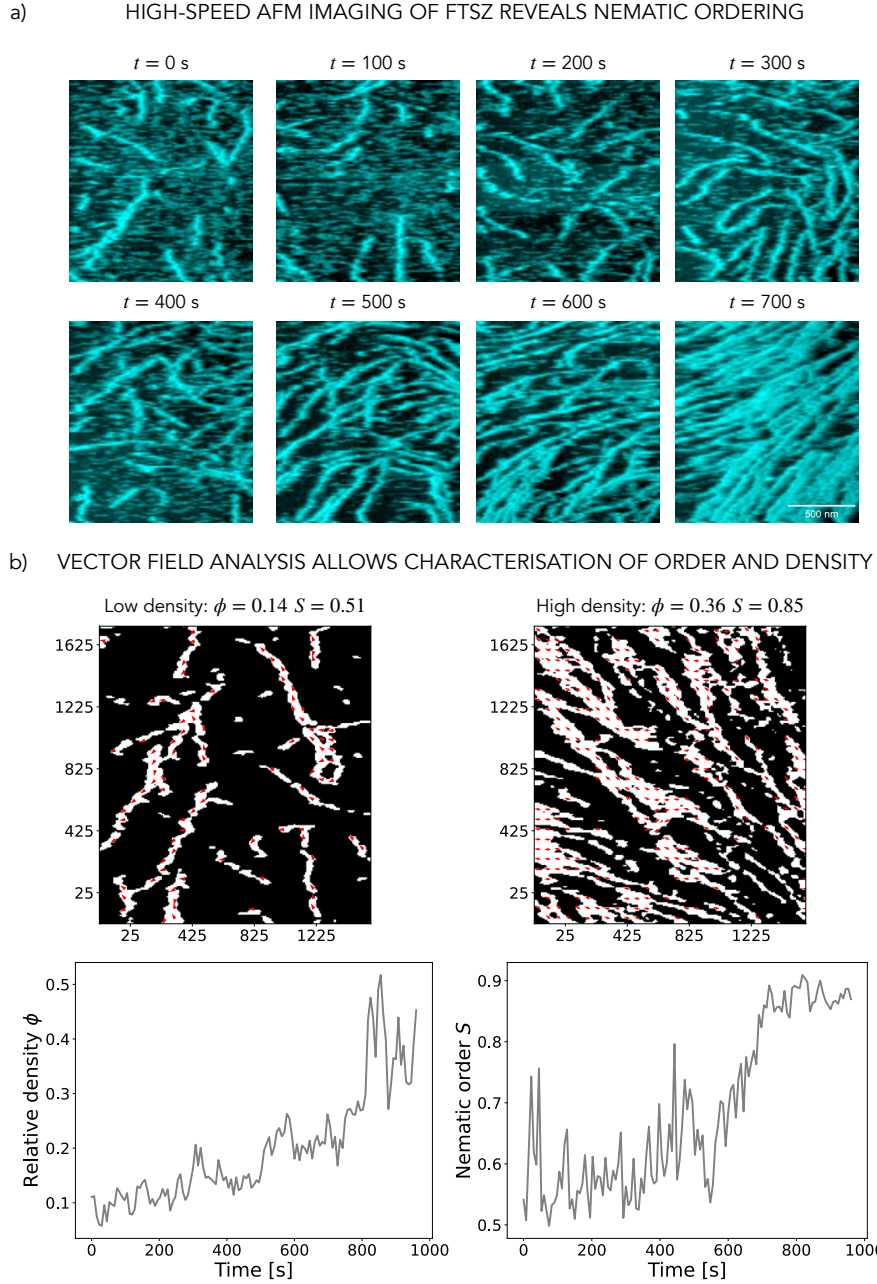

FIG. S16. **AFM imaging of reconstituted FtsZ** **a)** Time series of a system of wild-type FtsZ from *E. coli* undergoing a nematic order transition when reconstituted on a supported lipid bilayer. Images are acquired by High-Speed Atomic Force Microscopy. Scale bar: 500 nm. **b)** Top row: Vector field analysis of two representative snapshots ( $t = 150$  seconds and  $t = 900$  seconds respectively) of the system in panel a, including the resulting relative surface density  $\rho$  and nematic order  $S$ . White corresponds to measured filaments and black to empty space. Bottom row: Time series of the relative surface density  $\rho$  and nematic order parameter  $S$  as measured by vector field analysis of HS-AFM images.

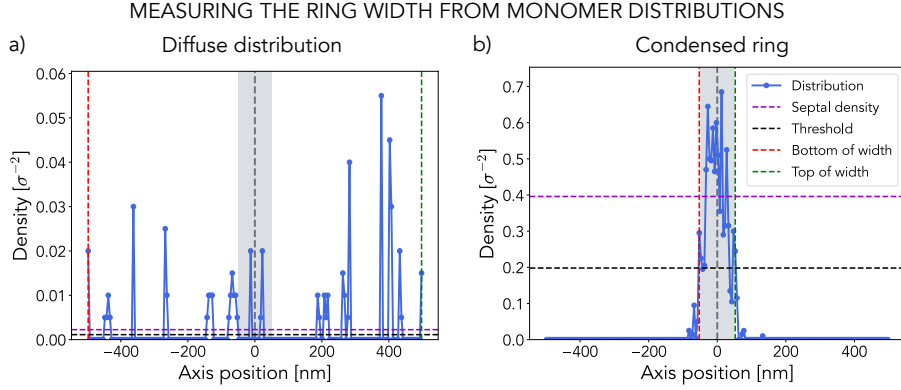

FIG. S17. **Measuring ring density and width** Monomer surface density distribution along the cell axis for two representative simulation frames (diffuse distribution – panel a, and condensed ring – panel b). The blue curve indicates the measured distribution of monomers. The purple dashed line the average density in the septal region ( $\|Y\| \leq w_{\text{prof}}$ , gray shaded region). The black dashed line indicates the established threshold for the distribution width (half of the septal density). The red and green vertical lines indicate the bottom and top edges of the measured width respectively (where the distribution value falls below threshold).

### 331 I. Implementing the spatio-temporal modulation of kinetics

332 We incorporate the spatio-temporal modulation of FtsZ polymerisation kinetics by partner  
 333 proteins and other positioning systems into our model as an instantaneous switch in the  
 334 growth and nucleation rates at time  $t = 0$  while keeping the detachment time  $\tau_{\text{det}}$  constant.  
 335 We assume FtsZ polymerisation is initially unperturbed and thus growth and nucleation rates  
 336 take on a uniform value across the cell body:  $r_{\text{on}}(t \leq 0, Y) = r_{\text{on}}^0 \text{ s}^{-1}$  and  $r_{\text{nuc}}(t \leq 0, Y) =$   
 337  $r_{\text{nuc}}^0 \text{ s}^{-1}$ , where  $Y$  is the position on the cell axis. Because chemical patterning systems,  
 338 condensates and chromosome association partners generally have the combined effect of  
 339 promoting FtsZ polymerisation around the midcell region while inhibiting it around the poles  
 340 of the cell [22–32], we model the modulated kinetics for  $t > 0$  as a Gaussian distribution  
 341 of typical width  $w_{\text{prof}}$  centered around midcell:  $r_{\text{on}}(t > 0, Y) = r_{\text{on}}^1 \exp(-4Y^2/w_{\text{prof}}^2) \text{ s}^{-1}$   
 342 and  $r_{\text{nuc}}(t > 0, Y) = r_{\text{nuc}}^1 \exp(-4Y^2/w_{\text{prof}}^2) \text{ s}^{-1}$ , where  $r_{\text{on}}^1/r_{\text{on}}^0 = r_{\text{nuc}}^1/r_{\text{nuc}}^0 > 1$ . Note that,  
 343 since ring widths have been measured experimentally to be around  $\sim 100 \text{ nm}$  [33–35], we

344 set  $w_{\text{prof}} = 100 \text{ nm} = 20\sigma$  unless stated otherwise. For the data shown in Figure 3 of the  
345 manuscript and Figure S18, for instance, we set  $r_{\text{on}}^0 = 2 \text{ s}^{-1}$ ,  $r_{\text{on}}^1 = 8 \text{ s}^{-1}$  and  $r_{\text{nuc}}^1 = 1 \text{ s}^{-1}$   
346 with  $\tau_{\text{det}} = 15 \text{ s}$ , while for the data in Figure 4 and Figure S20 we set  $r_{\text{on}}^0 = 2 \text{ s}^{-1}$ ,  $r_{\text{on}}^1 = 9 \text{ s}^{-1}$   
347 and  $r_{\text{nuc}}^1 = 1 \text{ s}^{-1}$  with  $\tau_{\text{det}} = 15 \text{ s}$ .

348 To characterise ring condensation in such simulations we quantify monomer surface den-  
349 sity distributions along the cell axis over time:  $\rho(t, Y) = \sum_i m_i \delta(Y_i - Y)/L$ , where  $m_i$  rep-  
350 resents monomer  $i$  and  $Y_i$  is its position along the cell axis.  $\delta(x)$  is the Dirac delta func-  
351 tion. With this we then compute the septal density as the average within the profile width  
352 ( $\rho_S(t) = \langle \rho(t, \|Y\| \leq w_{\text{prof}}) \rangle$ ) and the distribution width as the span of the region beyond  
353 which the density decays below half the average at midcell. See Figure S17 for an illustra-  
354 tion.

## 355 J. The effect of attractive interactions

356 To explore the suggested stabilising effects of cross-linking proteins during FtsZ condensa-  
357 tion into the Z-ring we introduce a generic Lennard-Jones (LJ) type of attraction between  
358 polymers (see Section A). To model only cross-linking effects and avoid self-interactions  
359 within the filaments we only consider attractive interactions of this type between monomers  
360 of different polymers.

361 As shown in Figure S18 and Figure 3 of the main text, we find that such cross-linking  
362 interactions have an important stabilising effect on the ring structures the model produces.  
363 We measure the density profile along the cell axis over time and observe that, as expected,  
364 cross-linked rings display a more condensed configuration, where filaments bundle closer  
365 together and most of the monomer population is confined to a narrower stripe around the  
366 midcell. As such, the profile displays a narrower and more peaked Gaussian-like distribution  
367 around midcell compared to non-cross-linked rings.

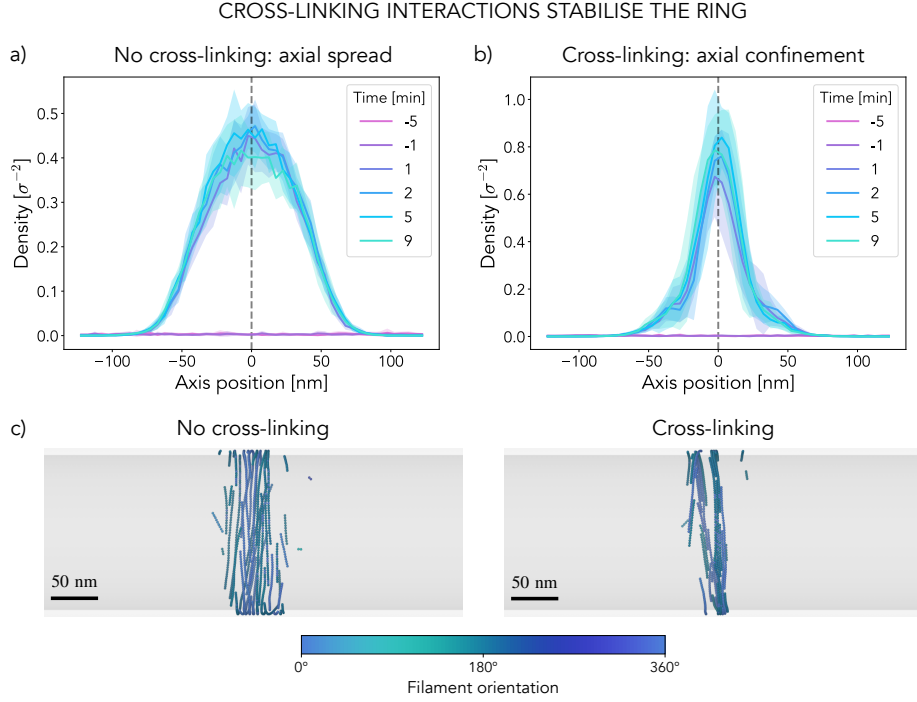

FIG. S18. **Cross-linking interactions stabilise and confine the ring axially** Monomer density profile along the cell axis for non-cross-linked (panel a) and cross-linked (panel b) filaments at different times along the simulation. Note the different scales in the two panels. Each curve is the result of averaging 1 minute around the indicated time ( $\pm 30$  s) over  $N = 10$  replicas (solid lines are the average and shaded regions the standard deviation). In all cases  $L = 200\sigma = 1\mu\text{m}$ ,  $l_p = 10\mu\text{m}$  and  $D = 100\text{nm}^2/\text{s}$ . To simulate ring formation we impose a kinetics modulation with parameters  $r_{\text{on}}^0 = 2\text{s}^{-1}$ ,  $r_{\text{on}}^1 = 8\text{s}^{-1}$  and  $r_{\text{nuc}}^1 = 1\text{s}^{-1}$  for  $\tau_{\text{det}} = 15\text{s}$  and  $w_{\text{prof}} = 100\text{nm}$ .

### 368 K. Z-ring dynamics analysis

369 We perform simulations of model treadmilling filaments subject to geometrical (curvature  
370 force  $f_{\text{curv}} = 5 k_B T$ ) and chemical biases (modulation of kinetics at time  $t = 0$ ) as well as  
371 cross-linking interactions to explore ring condensation dynamics. To simulate systems in cell-  
372 like conditions we set  $L = 600\sigma = 3\mu\text{m}$  such that our systems correspond to cylinders  $3\mu\text{m}$   
373 wide and  $\sim 1\mu\text{m}$  in diameter. Furthermore, it is known that a total of around  $\sim 5000$  FtsZ  
374 monomers are present in a typical *B. subtilis* cell, of which an estimated  $\sim 30 - 40\%$  are found  
375 in the Z-ring [19], so we constrain our systems to a maximum number of particles  $N_{\text{max}} =$



376 2000. Finally, because FtsZ/FtsA composites are expected to be quite stiff and present  
 377 negligible diffusion in experiments [1, 5, 18, 36, 37], we set  $l_p = 100 \mu\text{m}$  and  $D = 1 \text{ nm}^2/\text{s}$ .  
 378 For kinetics modulation we impose a transition in growth and nucleation rates following  
 379  $r_{\text{on}}^0 = 2 \text{ s}^{-1}$ ,  $r_{\text{on}}^1 = 9 \text{ s}^{-1}$  and  $r_{\text{nuc}}^1 = 1 \text{ s}^{-1}$ . In all cases we keep  $\tau_{\text{det}} = 15 \text{ s}$ . As for the width of  
 380 the profile, because Z-rings have been measured to be around 100 nm wide for *Caulobacter*  
 381 [33], *E. coli* [34] and especially *B. subtilis* [35] (our species of interest) we set  $w_{\text{prof}} = 100 \text{ nm}$ .  
 382 Note as well that because FtsZ seems confined to an area of around  $\sim 500 \text{ nm}$  around  
 383 midcell in early stages of the cell cycle we also impose a Gaussian kinetics profile for  $t < 0$ :  
 384  $r_{\text{on}}(t \leq 0, Y) = r_{\text{on}}^0 \exp(-4Y^2/w_{\text{conf}}^2) \text{ s}^{-1}$  and  $r_{\text{nuc}}(t \leq 0, Y) = r_{\text{nuc}}^0 \exp(-4Y^2/w_{\text{conf}}^2) \text{ s}^{-1}$ ,  
 385 where  $w_{\text{conf}} = 500 \text{ nm}$ . We simulate our rings over time  $t \in [-10, 10]$  minutes and measure  
 386 distribution widths along the cell axis together with average surface densities in the septal  
 387 region ( $|Y| \leq w_{\text{prof}}$ ) over time.

388 **Rescaling of *in vivo* data** We perform high-resolution imaging of FtsZ filament dynamics  
 389 in live *Bacillus subtilis* cells throughout all stages of division. For this purpose we developed  
 390 a custom microscopy setup based on vertical cell immobilisation by nanostructures termed  
 391 VerCINI [38]. With this approach we obtain quantitative measurements of Z-ring widths and  
 392 fluorescence intensities over time for  $N = 67$  cells [39] which we align in time such that all rings  
 393 nucleate at  $t = 0$  minutes (Figure S19a-b). In this study we focus on the dynamics of Z-ring  
 394 formation. In particular, we look at ring nucleation, characterised by the sudden ring width  
 395 collapse shortly after  $t = 0$ , which we observe consistently across all imaged cells (Figure  
 396 S19a,c,e). We also look at ring maturation, characterised by a sustained FtsZ intensity  
 397 increase in the septal region over time after ring nucleation, again consistently displayed  
 398 across all imaged cells (Figure S19b,d,f). However, raw measurements of ring widths and FtsZ  
 399 intensities cannot be used for quantitative comparison with simulations of model treadmilling  
 400 filaments. We thus work with rescaled quantities. For experimental measurements of Z-  
 401 ring widths, which are diffraction limited and do not capture the final ring width properly,

402 we rescale each individual trajectory such that the long-time average fits superresolution  
403 measurements of 100 nm [33–35] without affecting the widths before condensation ( $t < 0$ ). For  
404 FtsZ intensity in the septal region, which we take as a proxy for monomer density, we rescale  
405 each individual trajectory such that its values are confined between  $0.000 - 0.006 \text{ nm}^{-2} =$   
406  $0.00 - 0.15 \text{ 1/25 nm}^{-2} = 0.00 - 0.15 \sigma^{-2}$ , the estimated minimum and maximum FtsZ surface  
407 densities in live Z-rings. These estimates are based on a total number of 2000 FtsZ molecules  
408 [19] confined to a cylindrical region  $\sim 100 \text{ nm}$  wide and  $\sim 1 \mu\text{m}$  in diameter [33–35]). In  
409 this way we obtain rescaled trajectories for ring width and density which are then directly  
410 comparable to simulation results (Figure 4).

411 Experimental results of *in vivo* FtsZ dynamics presented here are re-analyses of raw data  
412 first presented in [39] - full details of sample and strain preparation, data acquisition and  
413 analysis methods, and raw experimental data can be found in that study.

414

415 **Resampling of simulation data** Because the data acquisition is different in simulations  
416 and *in vivo* experiments simulation measurements need to be resampled for proper quanti-  
417 tative comparison with *in vivo* data. The frame rate in our simulations is 10 seconds (Figure  
418 S20a-b) but experiments produce 1 data point per minute (Figure S19) so for proper com-  
419 parison we average simulation data over 1 – minute intervals across all replicas ( $N = 10$ )  
420 such that a single point and error value are produced for each minute of simulation (Figure  
421 S20c-d). Note that independently of the time sampling method average trajectories always  
422 display an abrupt rapid distribution collapse around  $t = 0$  (Figure S20a) and a slow sustained  
423 accumulation of monomers to the septal region (Figure S20b).

#### 424 **L. Arrested treadmilling stops condensation in simulations**

425 To test how much the ring condensation observed in simulations is dependent on treadmilling  
426 dynamics we perform additional simulations of the same system (with kinetic parameters

427  $r_{\text{on}}^0 = 2 \text{ s}^{-1}$ ,  $r_{\text{on}}^1 = 9 \text{ s}^{-1}$ ,  $r_{\text{nuc}}^1 = 1 \text{ s}^{-1}$ ,  $\tau_{\text{det}} = 15$  seconds and profile width  $w_{\text{prof}} = 100 \text{ nm}$ )  
428 but now arrest treadmilling at different stages of ring condensation and maturation. We  
429 arrest treadmilling by turning off the depolymerisation reaction, such that  $p_{\text{off}} = 0$  after a  
430 certain time  $t_{\text{arrest}}$ . This has the effect of stopping monomer turnover. Like for the *in vivo*  
431 data comparison, we work with systems of size  $L = 600\sigma = 3 \mu\text{m}$  with a maximum amount  
432 of monomers  $N_{\text{max}} = 2000$  and set  $l_p = 100 \mu\text{m}$  and  $D = 1 \text{ nm}^2/\text{s}$ . We find that if we turn  
433 off the dynamics before the onset of condensation ( $t = 0$ ) the filament population fails to  
434 localise to the midcell region (Figure S21) and only the existing structures grow until the  
435 maximum number of monomers is reached. Indeed, instead of ring-like dynamic structures  
436 we now obtain frozen long filaments that remain disperse along the cell axis (Figure S21b).  
437 Note that if we inhibit treadmilling during maturation the ring instead remains condensed  
438 but becomes frozen in arbitrary configurations (Figure S21b), which might have important  
439 consequences for the recruitment of downstream divisome proteins.

#### 440 **M. Reconstitution of FtsZ *in vitro*: Materials and Methods**

441 **Protein biochemistry** Proteins used in this study, FtsZ and FtsA, were purified as previ-  
442 ously described [2].

443

444 **Preparation of coverslips** We used piranha solution (30%  $\text{H}_2\text{O}_2$  mixed with concentrated  
445  $\text{H}_2\text{SO}_4$  at a 1 : 3 ratio) to clean the glass coverslips for 60 min. This was followed by extensive  
446 washes with double-distilled  $\text{H}_2\text{O}$ , 10 min sonication in dd $\text{H}_2\text{O}$  and again washing in dd $\text{H}_2\text{O}$ .  
447 The coverslips were used within one week and were stored in dd $\text{H}_2\text{O}$  water. Furthermore,  
448 before coverslips were used to form supported lipid bilayers, they were dried with compressed  
449 air and treated for 10 min with a Zepto plasma cleaner (Diener electronics) at maximum  
450 power. As reaction chambers we used 0.5 ml Eppendorf tubes missing the conical end, which  
451 were glued on the coverslips with UV glue (Norland Optical Adhesive 63) and exposed to

452 ultraviolet light for 10 min.

453

454 **Preparation of small unilamellar vesicles (SUVs)** DOPC (1,2-dioleoyl-sn-glycero-  
455 3-phosphocholine) and DOPG (1,2-dioleoyl-sn-glycero-3-phospho-(1'-rac-glycerol)), which  
456 were purchased from Avanti Polar Lipids, at a ratio of 67 : 33 mol% were used. The lipids in  
457 chloroform solution were mixed inside a glass vial in the appropriate volumes and dried with  
458 filtered N<sub>2</sub> for a thin lipid film. Remaining solvent was removed by putting the lipids in a  
459 vacuum desiccator for 2 h. Afterwards swelling buffer (50mM Tris-HCl [pH 7.4] and 300mM  
460 KCl) was added to the lipid film to obtain a lipid concentration of 5mM. After incubating  
461 the suspension for 30 min at room temperature, the multilamellar vesicles were vortexed  
462 rigorously and freeze-thawed (8×) in dry ice or liquid N<sub>2</sub>. The liposomes were tip-sonicated  
463 using a Q700 Sonicator equipped with a 0.5mm tip (amplitude = 1, 1 second on, 4 seconds  
464 off) for 25 min on ice to obtain SUVs. Finally, the vesicles were centrifuged for 5 min at  
465 10,000g and the supernatant was stored at 4°C in an Argon atmosphere and used within  
466 one week.

467

468 **Preparation of supported lipid bilayers (SLB) for TIRF** SLBs were prepared by  
469 diluting the SUV suspension to a concentration of 0.5mM with reaction buffer (50mM Tris-  
470 HCl [pH 7.4], 150mM KCl and 5mM MgCl<sub>2</sub>) supplemented with 5mM CaCl<sub>2</sub>. SLBs were  
471 incubated for 30 min at 37°C and non-fused vesicles were washed away by 8 × 200μL washes  
472 with reaction buffer. The membranes were used within 4 hours.

473

474 **Total internal reflection fluorescence (TIRF) microscopy** Experiments were per-  
475 formed using an iMIC TILL Photonics microscope equipped with a 100× Olympus TIRF  
476 NA 1.49 differential interference contrast objective. The fluorophores were excited using  
477 laser lines at 488 or 640 nm. The emitted fluorescence from the sample was filtered using

478 an Andromeda quad-band bandpass filter (FF01-446-523-600-677). For the dual-colour ex-  
479 periments, an Andor TuCam beam splitter equipped with a spectral long pass of 640 nm  
480 and band pass filter combinations of 525/50 and 679/41 nm were used. Time series were  
481 recorded using iXon Ultra 897 EMCCD Andor cameras (X-8499 and X-8533) operating at  
482 a frequency of 5 Hz.

483

484 **High speed atomic force microscopy (HS-AFM)** A laboratory-built tapping mode (2  
485 nm free amplitude,  $\sim 2.2$  MHz) high-speed atomic force microscope (HS-AFM) equipped  
486 with a wide-range scanner ( $6\mu\text{M} \times 6\mu\text{M}$ ) was used to visualize the dynamics of the system.  
487 BL-AC10DS-A2 (Olympus) cantilevers were used as HS-AFM scanning probes. The can-  
488 tilever has a spring constant ( $k$ ) of 0.1N/m and a resonance frequency ( $f$ ) of 0.6MHz in  
489 water or 1.5MHz in air. The dimensions of the cantilever are:  $9\mu\text{m}$  (length),  $2\mu\text{m}$  (width),  
490 and  $0.13\mu\text{m}$  (thickness). To achieve high imaging resolution, a sharpened and long carbon  
491 tip with low apical radius was made on the existing tip of the cantilever using electron-beam  
492 deposition (EBD) [40–42]. Scanning speed varied from 0.2 to 5 seconds per frame. The  
493 number of pixels acquired were adjusted for every measurement depending on the scan  
494 size (min: 2nm, max: about 50nm). The in-house designed program “Kodec” was used to  
495 read the data generated by HS-AFM. The software stores all parameters, calibration and  
496 description given during the measurement and allows to load a whole folder or several movies.

497

498 **FtsZ TIRF experiments on SLBs** To visualize treadmilling FtsZ filaments on supported  
499 lipid bilayers, we used  $0.2\mu\text{M}$  FtsA and  $1.25\mu\text{M}$  Alexa488-FtsZ (1 : 4 mixed with unla-  
500 belled FtsZ) in  $100\mu\text{L}$  of reaction buffer. Additionally, the reaction chamber contained 4mM  
501 ATP/GTP and a scavenging system to minimize photobleaching effects: 30mM d-glucose,  
502 0.050mg/ml Glucose Oxidase, 0.016mg/ml Catalase, 1mM DTT and 1mM Trolox. Prior  
503 addition of all components a corresponding buffer volume was removed from the chamber

504 to obtain a total reaction volume of  $100\mu\text{L}$ . The FtsZ filaments were imaged by TIRF at 1  
505 frame every 2 seconds and 50ms exposure time.

506 For single-molecule experiments individual FtsZ proteins were imaged at single-molecule  
507 level by adding small amounts of Cy5-labelled FtsZ ( $100\text{pM}$ ) to a chamber with  $0.2\mu\text{M}$   
508 FtsA and  $1.25\mu\text{M}$  Alexa488-FtsZ. Data presented in this study was already published in [43]  
509 where more details on the experiment can be found.

510

511 **Image processing and analysis** For data analysis, the movies were imported to the FIJI  
512 software [44]. For data analysis, raw, unprocessed time-lapse videos were used.

513

514 **Treadmilling and autocorrelation analysis of FtsZ filaments and single molecules**

515 Treadmilling dynamics as well as the directional autocorrelation were quantified using an  
516 automated image analysis protocol previously developed by our group [45].

517

518 **Single-molecule analysis of FtsZ** Single molecules of FtsZ were tracked using the Track-  
519 Mate plugin from ImageJ [46]. To obtain the residence time of FtsZ, we performed a  
520 residence time analysis as introduced in previous work [43, 47]. Shortly, single molecules  
521 were imaged at different acquisition rates ( $0.1 - 2$  seconds) and the lifetime of the molecules  
522 was extracted from each data set. To account for photobleaching effect, the obtained life-  
523 times were plotted against the acquisition rate and a linear regression was fitted to this data.  
524 The photobleach corrected lifetime was obtained by taking the inverse of the slope of the  
525 linear regression.

526

527 **Preparation of SLBs for HS-AFM** SUVs were prepared as described above. An ultra-  
528 flat muscovite mica layers ( $1.5$  mm diameter) substrate was mounted on a glass stage using  
529 a standard 2-component glue. The glass stage was then attached to the scanner with a

530 thin film of nail polish. A drop of acetone was deposited on the stage/scanner interface to  
531 ensure a flat nail polish layer. The mounted stage was dried at RT for about 30 min. A  
532 fresh cleaved mica layer was used as substrate to form a supported lipid bilayer (SLB) by  
533 depositing  $\sim 4 \mu\text{L}$  of a mix of 1 mM SUVs suspension in reaction buffer with additional  
534 5 mM  $\text{CaCl}_2$ . To avoid drop breakage, the scanner was flipped upside down and inserted  
535 in a custom-made mini-chamber with a thin water film at the bottom (a 500  $\mu\text{L}$  tube cut  
536 on the bottom and glued to a petri dish). The drop was incubated on the stage for at least  
537 30 min. After, the drop was exchanged 5-10 times with 5  $\mu\text{L}$  of fresh reaction buffer. The  
538 stage was immediately inserted in the HS-AFM chamber containing about 80  $\mu\text{L}$  of the same  
539 reaction buffer.

540 Prior to the addition of the proteins, HS-AFM imaging and indentation were performed  
541 to assess the quality of the SLB. When the force-distance curve showed the typical lipid  
542 bilayer indentation profile ( $\sim 2 - 4 \text{ nm}$ ) the SLB was used in the next steps.

543

544 **FtsZ HS-AFM experiments on SLBs** The proteins were added to the chamber with  
545 ATP/GTP (4 mM each) and DTT (1 mM). Movies used for the analysis contained 1 – 2  $\mu\text{M}$   
546 for FtsZ and 0.5  $\mu\text{M}$  FtsA.

547

548 **Computing the type of motion of FtsZ single molecules** In this study, we tracked  
549 FtsZ single molecules using the TrackMate plugin in ImageJ, and exported the resulting  
550 trajectories as xml files. The type of movement exhibited by each trajectory was determined  
551 through the use of custom Python code available at [https://github.com/paulocaldas/](https://github.com/paulocaldas/trajectory_analysis_v2)  
552 `trajectory_analysis_v2`. Specifically, we fitted a linear equation  $y = D t^\alpha$  to the mean  
553 square displacement (MSD) of each FtsZ trajectory, with  $\alpha$  representing the scaling exponent  
554 used to classify the type of motion. Trajectories with  $\alpha < 0.6$  were classified as confined,  
555 those with  $0.6 < \alpha < 1.2$  as Brownian, and those with  $\alpha > 1.2$  as directed. To ensure that

556 no short events displaying directed motion were missed, we performed this analysis on sub-  
557 segments of each trajectory (window size = 10 frames). With this approach we count the  
558 number of tracks for which a certain type of motion was observed, such that if a track  
559 displays both Brownian and confined motion, for instance, then both types of motion would  
560 increase their count by +1. The results of this analysis are displayed in Figure S7, which  
561 clearly indicates that no directional motion of FtsZ was observed, most of it corresponding  
562 to confined motion.

## 563 N. Supplementary Movies

564 **Supplementary Movie 1:** Single treadmilling filament evolving over 30 s in a box of size  
565  $L = 100\sigma$ . Here  $l_p = 10 \mu\text{m}$  and  $D = 100 \text{ nm}^2/\text{s}$ . Bar scale is 100 nm and the video includes  
566 a timestamp.

567 **Supplementary Movie 2:** Disordered treadmilling system evolution over 20 minutes in a  
568 box of size  $L = 200\sigma = 1 \mu\text{m}$ . Filaments are nucleated at a rate  $r_{\text{nuc}} = 1 \text{ s}^{-1}$  and treadmilling  
569 kinetics are set by  $r_{\text{on}} = 4 \text{ s}^{-1}$  and  $\tau_{\text{det}} = 6 \text{ s}$ , corresponding to the pink region in Figure  
570 2a. Here  $l_p = 10 \mu\text{m}$  and  $D = 100 \text{ nm}^2/\text{s}$ . Bar scale is 200 nm and the video includes a  
571 timestamp.

572 **Supplementary Movie 3:** Ordering treadmilling system evolution over 20 minutes in a  
573 box of size  $L = 200\sigma = 1 \mu\text{m}$ . Filaments are nucleated at a rate  $r_{\text{nuc}} = 1 \text{ s}^{-1}$  and treadmilling  
574 kinetics are set by  $r_{\text{on}} = 8 \text{ s}^{-1}$  and  $\tau_{\text{det}} = 15 \text{ s}$ , corresponding to the blue region in Figure  
575 2a. Here  $l_p = 10 \mu\text{m}$  and  $D = 100 \text{ nm}^2/\text{s}$ . Bar scale is 200 nm and the video includes a  
576 timestamp.

577 **Supplementary Movie 4:** Arrested treadmilling system evolution over 20 minutes in a  
578 box of size  $L = 200\sigma = 1 \mu\text{m}$ . Filaments are nucleated at a rate  $r_{\text{nuc}} = 1 \text{ s}^{-1}$  and tread-  
579 milling kinetics are set by  $r_{\text{on}} = 8 \text{ s}^{-1}$  and  $\tau_{\text{det}} = 15 \text{ s}$ , but  $p_{\text{off}} = 0$  throughout (arrested  
580 treadmilling). Here  $l_p = 10 \mu\text{m}$  and  $D = 100 \text{ nm}^2/\text{s}$ . Bar scale is 200 nm and the video



581 includes a timestamp. The absence of turnover prevents nematic defect dissolution.

582 **Supplementary Movie 5:** High-Speed AFM image sequence of *E. coli* FtsZ reconstituted  
583 on a supported lipid bilayer, imaged over  $\sim 13$  minutes. Bar scale is 500 nm and the video  
584 includes a timestamp.

585 **Supplementary Movie 6:** High-Speed AFM image sequence of mutant L169R FtsZ re-  
586 constituted on a supported lipid bilayer, imaged over  $\sim 13$  minutes. Bar scale is 500 nm  
587 and the video includes a timestamp. The inhibited depolymerisation and turnover prevents  
588 nematic defect dissolution.

589 **Supplementary Movie 7:** Trapped filament dissolution. Simulation trajectory example of  
590 a single treadmilling filament (highlighted in purple) colliding and getting trapped against  
591 its neighbours until eventual dissolution, as its tail keeps shrinking. Kinetic parameters used:  
592  $r_{\text{nuc}} = 1 \text{ s}^{-1}$ ,  $r_{\text{on}} = 8 \text{ s}^{-1}$  and  $\tau_{\text{det}} = 15 \text{ s}$ . System is  $L = 200\sigma = 1 \text{ }\mu\text{m}$  in size and  $l_{\text{p}} = 10 \text{ }\mu\text{m}$   
593 and  $D = 100 \text{ nm}^2/\text{s}$ . Bar scale is 100 nm and the video includes a timestamp.

594 **Supplementary Movie 8:** Three-dimensional reconstruction of a ring condensation tra-  
595 jectory from simulations for *in vivo* conditions. Kinetic parameters:  $r_{\text{on}}^0 = 2 \text{ s}^{-1}$ ,  $r_{\text{on}}^1 = 9 \text{ s}^{-1}$   
596 and  $r_{\text{nuc}}^1 = 1 \text{ s}^{-1}$  for  $\tau_{\text{det}} = 15 \text{ s}$  and  $w_{\text{prof}} = 100 \text{ nm}$ . System is  $L = 600\sigma = 3 \text{ }\mu\text{m}$  in size (so  
597  $R \sim 1 \text{ }\mu\text{m}$ ) and  $l_{\text{p}} = 100 \text{ }\mu\text{m}$  and  $D = 1 \text{ nm}^2/\text{s}$ . Monomers are rendered with size 20 nm in-  
598 stead of the actual 5 nm for visualisation purposes and are coloured according to orientation  
599 (see wheel), scale bar is 200 nm. The video includes a timestamp for which  $t = 0$  corresponds  
600 to the onset of the chemical pattern.

601 **Supplementary Movie 9:** Three-dimensional reconstruction of a ring condensation trajec-  
602 tory from simulations for *in vivo* conditions where kinetics are arrested ( $p_{\text{off}} = 0$ ) 5 minutes  
603 before the onset of modulation. Kinetic parameters:  $r_{\text{on}}^0 = 2 \text{ s}^{-1}$ ,  $r_{\text{on}}^1 = 9 \text{ s}^{-1}$  and  $r_{\text{nuc}}^1 = 1 \text{ s}^{-1}$   
604 for  $\tau_{\text{det}} = 15 \text{ s}$  and  $w_{\text{prof}} = 100 \text{ nm}$ . System is  $L = 600\sigma = 3 \text{ }\mu\text{m}$  in size (so  $R \sim 1 \text{ }\mu\text{m}$ ) and  
605  $l_{\text{p}} = 100 \text{ }\mu\text{m}$  and  $D = 1 \text{ nm}^2/\text{s}$ . Monomers are rendered with size 20 nm instead of the actual  
606 5 nm for visualisation purposes and are coloured according to orientation (see wheel), scale

607 bar is 200 nm. The video includes a timestamp for which  $t = 0$  corresponds to the onset of  
608 the chemical pattern.

609 **Supplementary Movie 10:** Three-dimensional reconstruction of a ring condensation tra-  
610 jectory from simulations for *in vivo* conditions where kinetics are arrested ( $p_{\text{off}} = 0$ ) 5 minutes  
611 after the onset of modulation. Kinetic parameters:  $r_{\text{on}}^0 = 2 \text{ s}^{-1}$ ,  $r_{\text{on}}^1 = 9 \text{ s}^{-1}$  and  $r_{\text{nuc}}^1 = 1 \text{ s}^{-1}$   
612 for  $\tau_{\text{det}} = 15 \text{ s}$  and  $w_{\text{prof}} = 100 \text{ nm}$ . System is  $L = 600\sigma = 3 \mu\text{m}$  in size (so  $R \sim 1 \mu\text{m}$ ) and  
613  $l_{\text{p}} = 100 \mu\text{m}$  and  $D = 1 \text{ nm}^2/\text{s}$ . Monomers are rendered with size 20 nm instead of the actual  
614 5 nm for visualisation purposes and are coloured according to orientation (see wheel), scale  
615 bar is 200 nm. The video includes a timestamp for which  $t = 0$  corresponds to the onset of  
616 the chemical pattern.

- 
- 617 [1] M. Loose and T.J. Mitchison The bacterial cell division proteins FtsA and FtsZ self-organize  
618 into dynamic cytoskeletal patterns *Nature Cell Biology* 16(1) 38–46 (2014).
- 619 [2] P. Radler *et al.* In vitro reconstitution of Escherichia coli divisome activation *Nature Com-*  
620 *munications* 13(1) 1–15 (2022).
- 621 [3] H.P. Erickson Modeling the physics of FtsZ assembly and force generation *Proceedings of the*  
622 *National Academy of Sciences of the United States of America* 106(23) 9238–9243 (2009).
- 623 [4] B. Ghosh and A. Sain. Origin of contractile force during cell division of bacteria *Physical*  
624 *Review Letters* 101(17) 1–4 (2008).
- 625 [5] T. Nierhaus *et al.* Bacterial divisome protein FtsA forms curved antiparallel double filaments  
626 when binding to FtsN *Nature Microbiology* 7(10) 1686–1701 (2022).
- 627 [6] A.P. Thompson *et al.* LAMMPS - a flexible simulation tool for particle-based materials model-  
628 ing at the atomic, meso, and continuum scales *Computer Physics Communications* 271 108171  
629 (2022).
- 630 [7] C. Vanhille-Campos and Šarić lab Treadmilling filaments repository [https://github.com/](https://github.com/Saric-Group/treadmilling)  
631 [Saric-Group/treadmilling](https://github.com/Saric-Group/treadmilling).
- 632 [8] J.R. Gissing, B.D. Jensen, and K.E. Wise Modeling chemical reactions in classical molecular  
633 dynamics simulations *Polymer* 128 211–217 (2017).
- 634 [9] J.R. Gissing, B.D. Jensen, and K.E. Wise Reactor: A heuristic method for reactive molecular  
635 dynamics *Macromolecules* 53(22) 9953–9961 (2020).
- 636 [10] C. Vanhille-Campos and Šarić lab Public repository storing the code and simulation data for  
637 this work <https://doi.org/10.5522/04/24754527>.
- 638 [11] J.M. Wagstaff *et al.* A polymerization-associated structural switch in ftsz that enables tread-  
639 milling of model filaments *mBio* 8(3) 1–16 (2017).

- 640 [12] J.M. Wagstaff *et al.* Diverse cytomotive actins and tubulins share a polymerization switch  
641 mechanism conferring robust dynamics *Science Advances* 9(13) 8–10 (2023).
- 642 [13] F.M. Ruiz *et al.* FtsZ filament structures in different nucleotide states reveal the mechanism  
643 of assembly dynamics *PLoS Biology* 20(3) 1–22 (2022).
- 644 [14] A. Wegner Head to Tail Polymerization of Actin *Journal of Molecular Biology* 108 139–150  
645 (1976).
- 646 [15] S. Du, S. Pichoff, K. Kruse, and J. Lutkenhaus FtsZ filaments have the opposite kinetic  
647 polarity of microtubules *Proceedings of the National Academy of Sciences of the United States*  
648 *of America* 115(42) 10768–10773 (2018).
- 649 [16] L.C. Corbin and H.P. Erickson A Unified Model for Treadmilling and Nucleation of Single-  
650 Stranded FtsZ Protofilaments *Biophysical Journal* 119(4) 792–805 (2020).
- 651 [17] Z. Hadjivasiliou and K. Kruse Selection for Size in Molecular Self-Assembly Drives the de  
652 Novo Evolution of a Molecular Machine *Physical Review Letters* 131(20) 208402 (2023).
- 653 [18] N. Baranova *et al.* Diffusion and capture permits dynamic coupling between treadmilling FtsZ  
654 filaments and cell division proteins *Nature Microbiology* 5 407–417 (2020).
- 655 [19] H.P. Erickson, D.E. Anderson, and M. Osawa FtsZ in bacterial cytokinesis: cytoskeleton and  
656 force generator all in one *Microbiol Mol Biol Rev* 74(4) 504–28 (2010).
- 657 [20] Z. Püspöki, M. Storath, D. Sage, and M. Unser Transforms and Operators for Directional  
658 Bioimage Analysis: A Survey *Advances in Anatomy, Embryology and Cell Biology* 219 69–93  
659 (2016).
- 660 [21] Z. Dunajova *et al.* Chiral and nematic phases of flexible active filaments *Nature Physics* 19  
661 1916–1926 (2023).
- 662 [22] M. Loose, E. Fischer-Friedrich, J. Ries, K. Kruse, and P. Schwille Spatial Regulators for  
663 Bacterial Cell Division Self-Organize *Science* 320 789–792 (2008).
- 664 [23] D. Kiekebusch, K.A. Michie, L.O. Essen, J. Löwe, and M. Thanbichler Localized Dimerization  
665 and Nucleoid Binding Drive Gradient Formation by the Bacterial Cell Division Inhibitor MipZ

- 666 *Molecular Cell* 46(3) 245–259 (2012).
- 667 [24] S. Arumugam, Z. Petrášek, and P. Schwille MinCDE exploits the dynamic nature of FtsZ  
668 filaments for its spatial regulation *Proceedings of the National Academy of Sciences of the*  
669 *United States of America* 111(13) 1192–1200 (2014).
- 670 [25] K. Zieske and P. Schwille. Reconstitution of self-organizing protein gradients as spatial cues  
671 in cell-free systems *eLife* 3 1–19 (2014).
- 672 [26] H. Feddersen, L. Würthner, E. Frey, and M. Bramkamp Dynamics of the bacillus subtilis min  
673 system *mBio* 12(2) (2021).
- 674 [27] L. Corrales-Guerrero *et al.* MipZ caps the plus-end of FtsZ polymers to promote their rapid  
675 disassembly *Proceedings of the National Academy of Sciences of the United States of America*  
676 119(50) 2017 (2022).
- 677 [28] B. Ramm *et al.* Biomolecular condensate drives polymerization and bundling of the bacterial  
678 tubulin FtsZ to regulate cell division *Nature Communications* 14(1) 3825 (2023).
- 679 [29] L.J. Wu and J. Errington Coordination of cell division and chromosome segregation by a  
680 nucleoid occlusion protein in bacillus subtilis *Cell* 117(7) 915–925 (2004).
- 681 [30] J. Lutkenhaus Linking DNA replication to the Z ring *Nature Microbiology* 6(9) 1108–1109  
682 (2021).
- 683 [31] J. Männik and M. W. Bailey. Spatial coordination between chromosomes and cell division  
684 proteins in *Escherichia coli* *Frontiers in Microbiology* 6 1–8 (2015).
- 685 [32] T.G. Bernhardt and P.A.J. De Boer SlmA, a nucleoid-associated, FtsZ binding protein required  
686 for blocking septal ring assembly over chromosomes in *E. coli* *Molecular Cell* 18(5) 555–564  
687 (2005).
- 688 [33] S.J. Holden *et al.* High throughput 3D super-resolution microscopy reveals *Caulobacter cres-*  
689 *centus* in vivo Z-ring organization *Proceedings of the National Academy of Sciences of the*  
690 *United States of America* 111(12) 4566–4571 (2014).

- 691 [34] R. McQuillen and J. Xiao Insights into the Structure, Function, and Dynamics of the Bacterial  
692 Cytokinetic FtsZ-Ring *Annual Review of Biophysics* 49 (309–341) (2020).
- 693 [35] K. Khanna, J. Lopez-Garrido, J. Sugie, K. Pogliano, and E. Villa Asymmetric localization of  
694 the cell division machinery during *Bacillus subtilis* sporulation. *eLife* 10:1 24 (2021).
- 695 [36] A.W. Bisson-Filho *et al.* Treadmilling by ftsz filaments drives peptidoglycan synthesis and  
696 bacterial cell division *Science* 355(6326) 739–743 (2017).
- 697 [37] X. Yang *et al.* GTPase activity-coupled treadmilling of the bacterial tubulin FtsZ organizes  
698 septal cell wall synthesis *Science* 355(6326) 744–747 (2017).
- 699 [38] K.D. Whitley, S. Middlemiss, C. Jukes, C. Dekker, and S. Holden High-resolution imaging  
700 of bacterial spatial organization with vertical cell imaging by nanostructured immobilization  
701 (VerCINI) *Nature Protocols* 17(3) 847–869 (2022).
- 702 [39] K.D. Whitley *et al.* FtsZ treadmilling is essential for Z-ring condensation and septal constrict-  
703 tion initiation in *Bacillus subtilis* cell division *Nature Communications* 12(1) 2448 (2021).
- 704 [40] K. Lim *et al.* High-Speed AFM Reveals Molecular Dynamics of Human Influenza A Hemag-  
705 glutinin and Its Interaction with Exosomes *Nano Letters* 20(9) 6320–6328 (2020).
- 706 [41] K. Lim *et al.* Millisecond dynamic of SARS-CoV-2 spike and its interaction with ACE2 receptor  
707 and small extracellular vesicles *Journal of Extracellular Vesicles* 10(14) e12170 (2021).
- 708 [42] E.S. Sajidah *et al.* Spatiotemporal tracking of small extracellular vesicle nanotopology in  
709 response to physicochemical stresses revealed by HS-AFM *Journal of Extracellular Vesicles*  
710 11(11) e12275 (2022).
- 711 [43] N. Baranova and M. Loose. Chapter 21 - single-molecule measurements to study polymeriza-  
712 tion dynamics of ftsz-ftsA copolymers In Arnaud Echard, editor, Cytokinesis *Methods in Cell*  
713 *Biology* 137 355–370 (2017).
- 714 [44] J. Schindelin *et al.* Fiji: an open-source platform for biological-image analysis *Nature Methods*  
715 9(7) 676–682 (2012).

- 716 [45] P. Caldas, P. Radler, C. Sommer, and M. Loose Chapter 8 - computational analysis of filament  
717 polymerization dynamics in cytoskeletal networks *Methods in Cell Biology, Academic Press*  
718 158 145–161 (2020).
- 719 [46] J.Y. Tinevez *et al.* Trackmate: An open and extensible platform for single-particle tracking  
720 *Methods* 115 80–90 (2017).
- 721 [47] J.C.M. Gebhardt *et al.* Single-molecule imaging of transcription factor binding to DNA in live  
722 mammalian cells *Nature Methods* 10(5) 421–426 (2013).

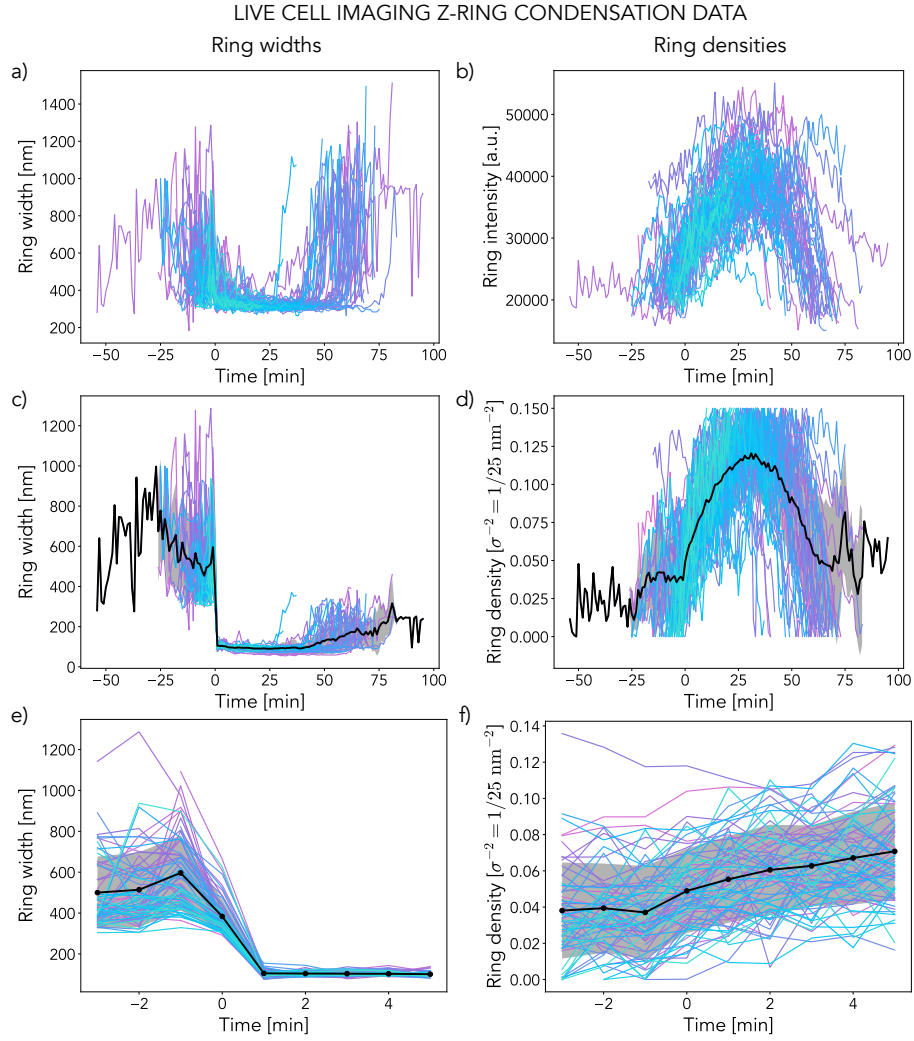

FIG. S19. **Experimental *in vivo* Z-ring data** **a)** Raw ring width trajectories over time aligned for width collapse at  $t = 0$  minutes. **b)** Raw ring intensity trajectories over time aligned for width collapse at  $t = 0$  minutes. **c)** Ring width trajectories for live cells adjusted for diffraction limits (estimated final ring width is 100 nm). **d)** Rescaled ring intensity trajectories to match estimated densities of up to  $0.15 \sigma^{-2} = 0.006 \text{ nm}^{-2}$  **e)** Ring width trajectories for live cells adjusted for diffraction limits around the collapse at time  $t = 0$  (estimated final ring width is 100 nm). **f)** Rescaled ring intensity trajectories around  $t = 0$ . In all cases the black curve and shaded region correspond to the average and standard deviation across all individual cells ( $N = 67$ , different colours).



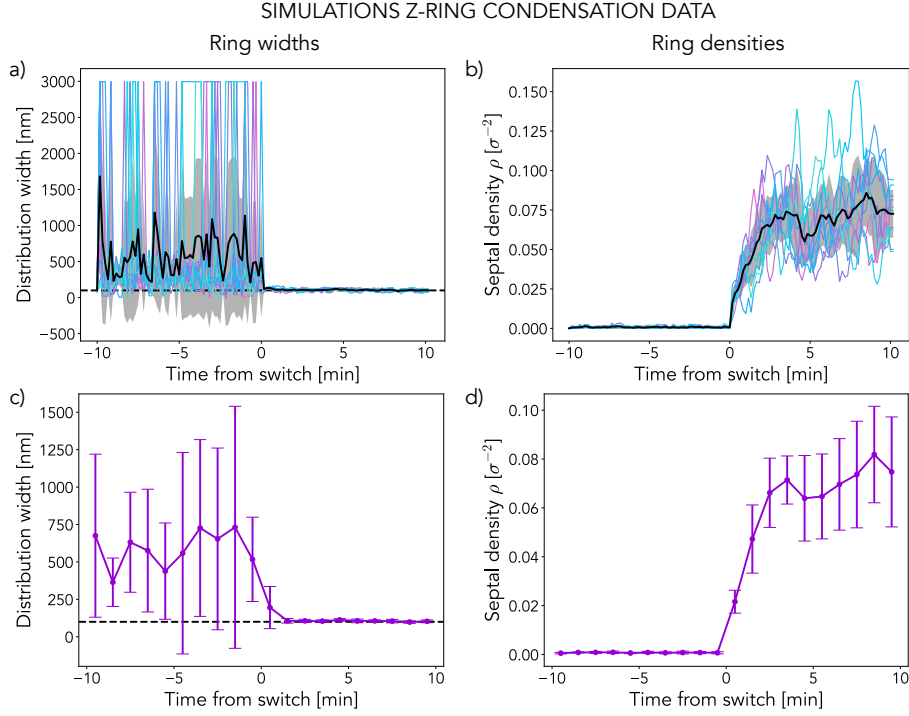

FIG. S20. **Simulation Z-ring data** **a)** Raw ring width trajectories over time. 1 point every 10 seconds. Black line is the average across  $N = 10$  replicas (coloured lines) and the shaded region is the standard deviation. **b)** Raw ring density trajectories over time. 1 point every 10 seconds. Black line is the average across  $N = 10$  replicas (coloured lines) and the shaded region is the standard deviation. **c)** Time-averaged ring width trajectories over time, 1 data point per minute. Each data point corresponds to the average of all values in the 1 minute interval across all  $N = 10$  replicas. Error bars are the standard deviation. **d)** Time-averaged ring density trajectories over time, 1 data point per minute. Each data point corresponds to the average of all values in the 1 minute interval across all  $N = 10$  replicas. Error bars are the standard deviation. Simulations were performed for  $r_{\text{on}}^0 = 2 \text{ s}^{-1}$ ,  $r_{\text{on}}^1 = 9 \text{ s}^{-1}$ ,  $r_{\text{nuc}}^1 = 1 \text{ s}^{-1}$ ,  $\tau_{\text{det}} = 15 \text{ s}$  and  $w_{\text{prof}} = 100 \text{ nm}$ . Systems are  $L = 600\sigma = 3 \mu\text{m}$ ,  $l_p = 100 \text{ nm}$  and  $D = 1 \text{ nm}^2/\text{s}$ .

## ARRESTING TREADMILLING DISRUPTS Z-RING CONDENSATION

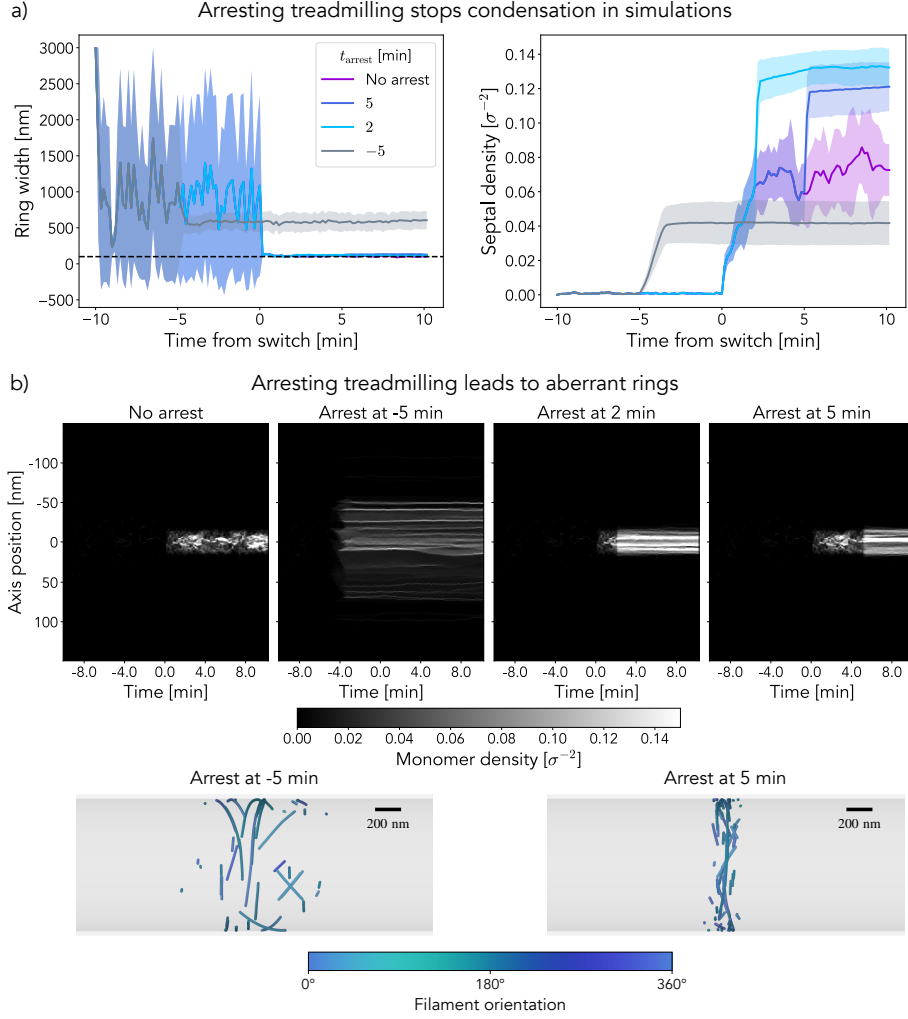

FIG. S21. **Arrested treadmilling stops condensation in simulations** a) Ring width and density curves over time for normal condensation simulations and arrested treadmilling at different times (see legend). Curves correspond to the average over  $N = 10$  replicas and shaded regions to the standard deviation. The dashed line in the left panel indicates the target width of 100 nm. b) Representative examples of the evolution in time of the monomer distribution along the axis of the cell for four different treadmilling arrest conditions. Even after condensation, treadmilling inhibition severely affects ring structure. Two representative snapshots of the final configuration for treadmilling arrest before and after condensation are shown. Note that monomers in simulations are rendered with size 20 nm instead of the actual 5 nm for visualisation purposes, scale bar is 200 nm. In all cases  $L = 600\sigma$ ,  $l_p = 10 \mu\text{m}$ ,  $D = 1 \text{ nm}^2/\text{s}$  for  $r_{\text{on}}^0 = 2 \text{ s}^{-1}$ ,  $r_{\text{on}}^1 = 9 \text{ s}^{-1}$ ,  $r_{\text{nuc}}^1 = 1 \text{ s}^{-1}$ ,  $\tau_{\text{det}} = 15 \text{ s}$  and  $w_{\text{prof}} = 100 \text{ nm}$ .
